# Supplementary material for: Discovery of hybrid Glypromate conjugates with neuroprotective activity against paraquat-induced toxicity
Source: Royal Society of Chemistry journal article supplement (doi:10.1039/d4md00584h), 2024-01-01
Supplement: d4md00584h1.pdf [file d4md00584h1.pdf]

Electronic Supplementary Information for:

*Discovery of Hybrid Glypromate Conjugates with  
Neuroprotective Activity Against Paraquat-Induced Toxicity*

Sara C. Silva-Reis,<sup>a,b</sup> Vera M. Costa,<sup>b,c</sup> Daniela Correia da Silva,<sup>d</sup> David M. Pereira,<sup>d</sup> Xavier Cruz Correia,<sup>a</sup> Xerardo García-Mera,<sup>e</sup> José E. Rodríguez-Borges,<sup>a</sup> Ivo E. Sampaio-Dias<sup>a,\*</sup>

<sup>a</sup>LAQV/REQUIMTE, Department of Chemistry and Biochemistry, Faculty of Sciences, University of Porto, 4169-007 Porto, Portugal.

<sup>b</sup>UCIBIO/REQUIMTE, Laboratory of Toxicology, Faculty of Pharmacy, University of Porto, 4050-313 Porto, Portugal.

<sup>c</sup>Associate Laboratory i4HB, Institute for Health and Bioeconomy, Faculty of Pharmacy, University of Porto, 4050-313 Porto, Portugal.

<sup>d</sup>LAQV/REQUIMTE, Laboratory of Pharmacognosy, Department of Chemistry, Faculty of Pharmacy, University of Porto, 4050-313 Porto, Portugal.

<sup>e</sup>Department of Organic Chemistry, Faculty of Pharmacy, University of Santiago de Compostela, E-15782 Santiago de Compostela, Spain.

\*E-mail: ivdias@fc.up.pt.

## Electronic Supplementary Information

### Table of Contents

|                                                                                                                                     |      |
|-------------------------------------------------------------------------------------------------------------------------------------|------|
| <b>Figure S1.</b> <sup>1</sup> H-NMR spectrum (400 MHz, CDCl <sub>3</sub> ) of conjugate <b>13a</b> .                               | SI-3 |
| <b>Figure S2.</b> <sup>13</sup> C{ <sup>1</sup> H}-NMR and DEPT-135 spectra (101 MHz, CDCl <sub>3</sub> ) of conjugate <b>13a</b> . | SI-3 |
| <b>Figure S3.</b> <sup>1</sup> H-NMR spectrum (400 MHz, CDCl <sub>3</sub> ) of conjugate <b>13b</b> .                               | SI-4 |
| <b>Figure S4.</b> <sup>13</sup> C{ <sup>1</sup> H}-NMR and DEPT-135 spectra (101 MHz, CDCl <sub>3</sub> ) of conjugate <b>13b</b> . | SI-4 |
| <b>Figure S5.</b> <sup>1</sup> H-NMR spectrum (400 MHz, CDCl <sub>3</sub> ) of conjugate <b>13c</b> .                               | SI-5 |
| <b>Figure S6.</b> <sup>13</sup> C{ <sup>1</sup> H}-NMR and DEPT-135 spectra (101 MHz, CDCl <sub>3</sub> ) of conjugate <b>13c</b> . | SI-5 |
| <b>Figure S7.</b> <sup>1</sup> H-NMR spectrum (400 MHz, CD <sub>3</sub> OD) of conjugate <b>14a</b> .                               | SI-6 |
| <b>Figure S8.</b> <sup>13</sup> C{ <sup>1</sup> H}-NMR and DEPT-135 spectra (101 MHz, CD <sub>3</sub> OD) of conjugate <b>14a</b> . | SI-6 |
| <b>Figure S9.</b> <sup>1</sup> H-NMR spectrum (400 MHz, CD <sub>3</sub> OD) of conjugate <b>14b</b> .                               | SI-7 |

## Electronic Supplementary Information

|                                                                                                                                         |       |
|-----------------------------------------------------------------------------------------------------------------------------------------|-------|
| <b>Figure S10.</b> $^{13}\text{C}\{^1\text{H}\}$ -NMR and DEPT-135 spectra (101 MHz, $\text{CD}_3\text{OD}$ ) of conjugate <b>14b</b> . | SI-7  |
| <b>Figure S11.</b> $^1\text{H}$ -NMR spectrum (400 MHz, $\text{CD}_3\text{OD}$ ) of conjugate <b>14c</b> .                              | SI-8  |
| <b>Figure S12.</b> $^{13}\text{C}\{^1\text{H}\}$ -NMR and DEPT-135 spectra (101 MHz, $\text{CD}_3\text{OD}$ ) of conjugate <b>14c</b> . | SI-8  |
| <b>Figure S13.</b> $^1\text{H}$ -NMR spectrum (400 MHz, $\text{CD}_3\text{OD}$ ) of conjugate <b>15a</b> .                              | SI-9  |
| <b>Figure S14.</b> $^{13}\text{C}\{^1\text{H}\}$ -NMR and DEPT-135 spectra (101 MHz, $\text{CD}_3\text{OD}$ ) of conjugate <b>15a</b> . | SI-9  |
| <b>Figure S15.</b> $^1\text{H}$ -NMR spectrum (400 MHz, $\text{CD}_3\text{OD}$ ) of conjugate <b>15b</b> .                              | SI-10 |
| <b>Figure S16.</b> $^{13}\text{C}\{^1\text{H}\}$ -NMR and DEPT-135 spectra (101 MHz, $\text{CD}_3\text{OD}$ ) of conjugate <b>15b</b> . | SI-10 |
| <b>Figure S17.</b> $^1\text{H}$ -NMR spectrum (400 MHz, $\text{CD}_3\text{OD}$ ) of conjugate <b>15c</b> .                              | SI-11 |
| <b>Figure S18.</b> $^{13}\text{C}\{^1\text{H}\}$ -NMR and DEPT-135 spectra (101 MHz, $\text{CD}_3\text{OD}$ ) of conjugate <b>15c</b> . | SI-11 |
| <b>Figure S19.</b> $^1\text{H}$ -NMR spectrum (400 MHz, $\text{CDCl}_3$ ) of conjugate <b>16a</b> .                                     | SI-12 |
| <b>Figure S20.</b> $^{13}\text{C}\{^1\text{H}\}$ -NMR and DEPT-135 spectra (101 MHz, $\text{CDCl}_3$ ) of conjugate <b>16a</b> .        | SI-12 |
| <b>Figure S21.</b> $^1\text{H}$ -NMR spectrum (400 MHz, $\text{CDCl}_3$ ) of conjugate <b>16b</b> .                                     | SI-13 |
| <b>Figure S22.</b> $^{13}\text{C}\{^1\text{H}\}$ -NMR and DEPT-135 spectra (101 MHz, $\text{CDCl}_3$ ) of conjugate <b>16b</b> .        | SI-13 |
| <b>Figure S23.</b> $^1\text{H}$ -NMR spectrum (400 MHz, $\text{CDCl}_3$ ) of conjugate <b>16c</b> .                                     | SI-14 |
| <b>Figure S24.</b> $^{13}\text{C}\{^1\text{H}\}$ -NMR and DEPT-135 spectra (101 MHz, $\text{CDCl}_3$ ) of conjugate <b>16c</b> .        | SI-14 |
| <b>Figure S25.</b> $^1\text{H}$ -NMR spectrum (400 MHz, $\text{CD}_3\text{OD}$ ) of conjugate <b>17a</b> .                              | SI-15 |
| <b>Figure S26.</b> $^{13}\text{C}\{^1\text{H}\}$ -NMR and DEPT-135 spectra (101 MHz, $\text{CD}_3\text{OD}$ ) of conjugate <b>17a</b> . | SI-15 |
| <b>Figure S27.</b> $^1\text{H}$ -NMR spectrum (400 MHz, $\text{CD}_3\text{OD}$ ) of conjugate <b>17b</b> .                              | SI-16 |
| <b>Figure S28.</b> $^{13}\text{C}\{^1\text{H}\}$ -NMR and DEPT-135 spectra (101 MHz, $\text{CD}_3\text{OD}$ ) of conjugate <b>17b</b> . | SI-16 |
| <b>Figure S29.</b> $^1\text{H}$ -NMR spectrum (400 MHz, $\text{CD}_3\text{OD}$ ) of conjugate <b>17c</b> .                              | SI-17 |
| <b>Figure S30.</b> $^{13}\text{C}\{^1\text{H}\}$ -NMR and DEPT-135 spectra (101 MHz, $\text{CD}_3\text{OD}$ ) of conjugate <b>17c</b> . | SI-17 |
| <b>Figure S31.</b> $^1\text{H}$ -NMR spectrum (400 MHz, $\text{CD}_3\text{OD}$ ) of conjugate <b>18a</b> .                              | SI-18 |
| <b>Figure S32.</b> $^{13}\text{C}\{^1\text{H}\}$ -NMR and DEPT-135 spectra (101 MHz, $\text{CD}_3\text{OD}$ ) of conjugate <b>18a</b> . | SI-18 |
| <b>Figure S33.</b> $^1\text{H}$ -NMR spectrum (400 MHz, $\text{CD}_3\text{OD}$ ) of conjugate <b>18b</b> .                              | SI-19 |
| <b>Figure S34.</b> $^{13}\text{C}\{^1\text{H}\}$ -NMR and DEPT-135 spectra (101 MHz, $\text{CD}_3\text{OD}$ ) of conjugate <b>18b</b> . | SI-19 |
| <b>Figure S35.</b> $^1\text{H}$ -NMR spectrum (400 MHz, $\text{CD}_3\text{OD}$ ) of conjugate <b>18c</b> .                              | SI-20 |
| <b>Figure S36.</b> $^{13}\text{C}\{^1\text{H}\}$ -NMR and DEPT-135 spectra (101 MHz, $\text{CD}_3\text{OD}$ ) of conjugate <b>18c</b> . | SI-20 |

Electronic Supplementary Information

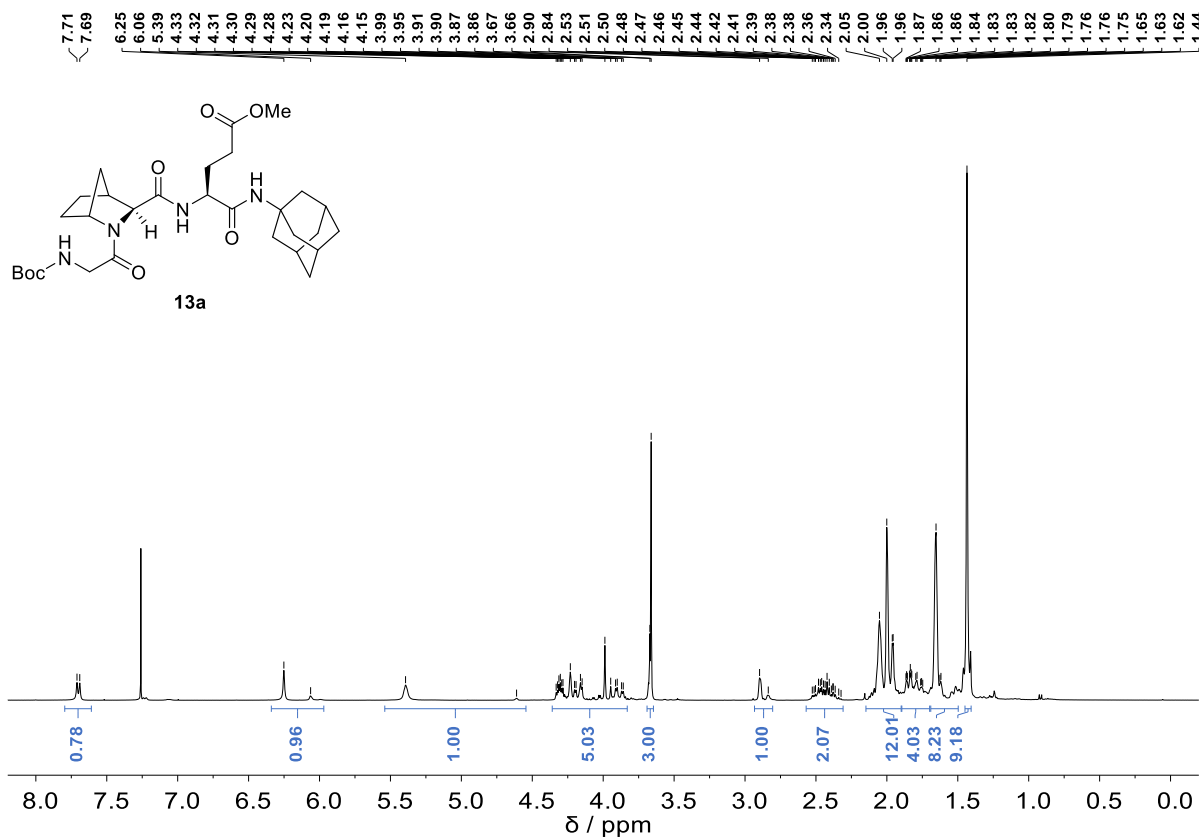

Figure S1.  $^1\text{H-NMR}$  spectrum (400 MHz,  $\text{CDCl}_3$ ) of conjugate **13a**.

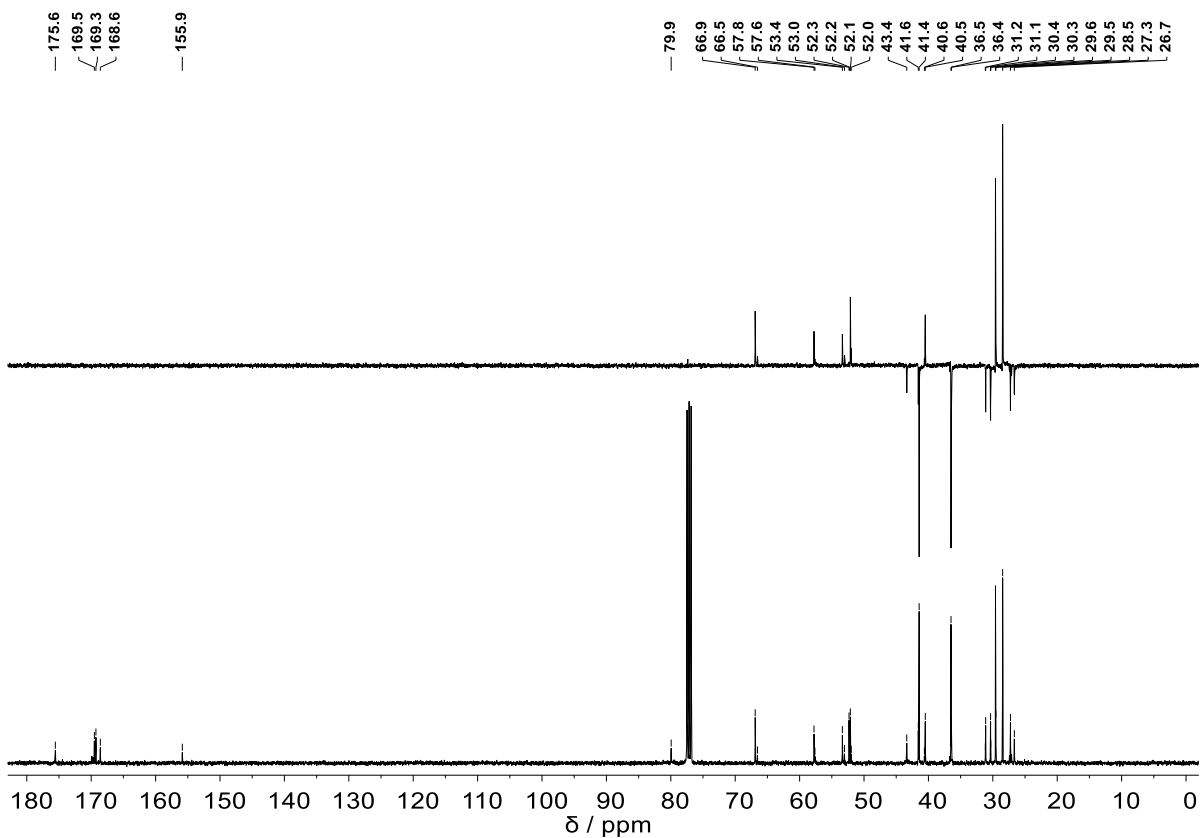

Figure S2.  $^{13}\text{C}\{^1\text{H}\}$ -NMR and DEPT-135 spectra (101 MHz,  $\text{CDCl}_3$ ) of conjugate **13a**.

Electronic Supplementary Information

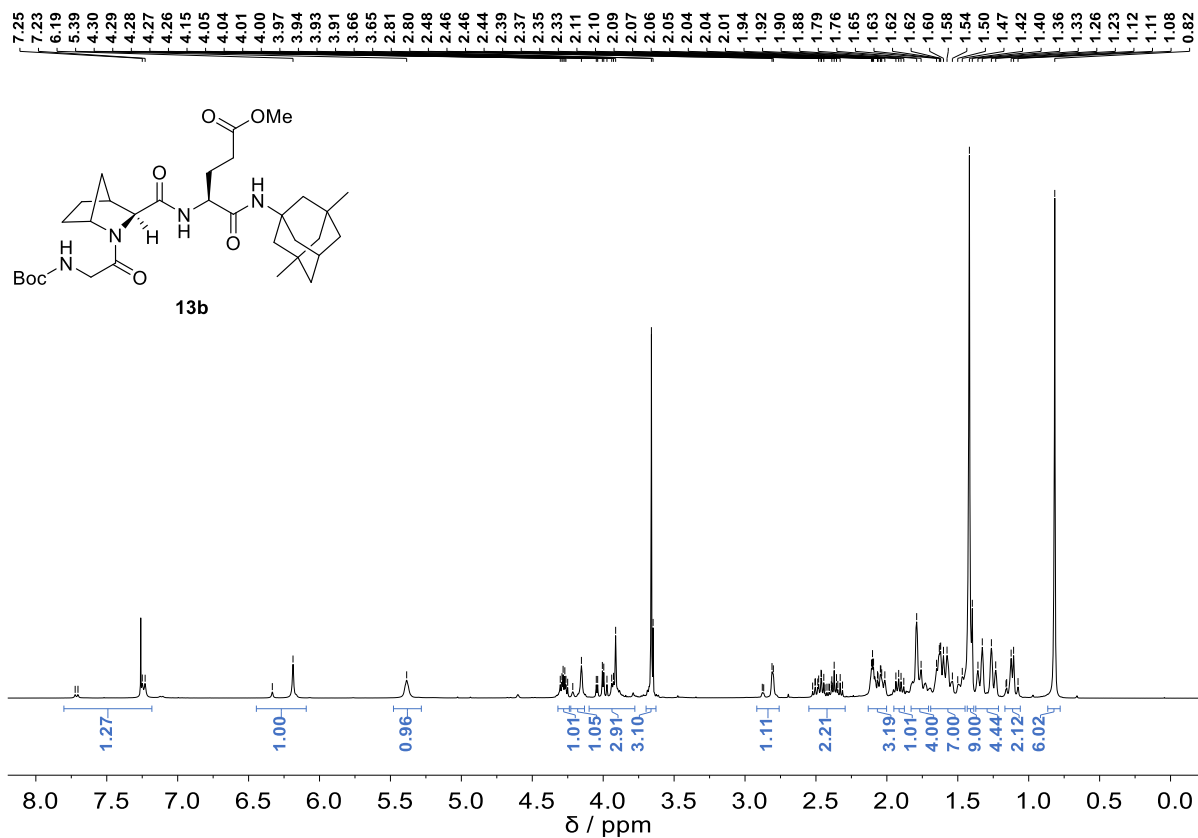

Figure S3. <sup>1</sup>H-NMR spectrum (400 MHz, CDCl<sub>3</sub>) of conjugate **13b**.

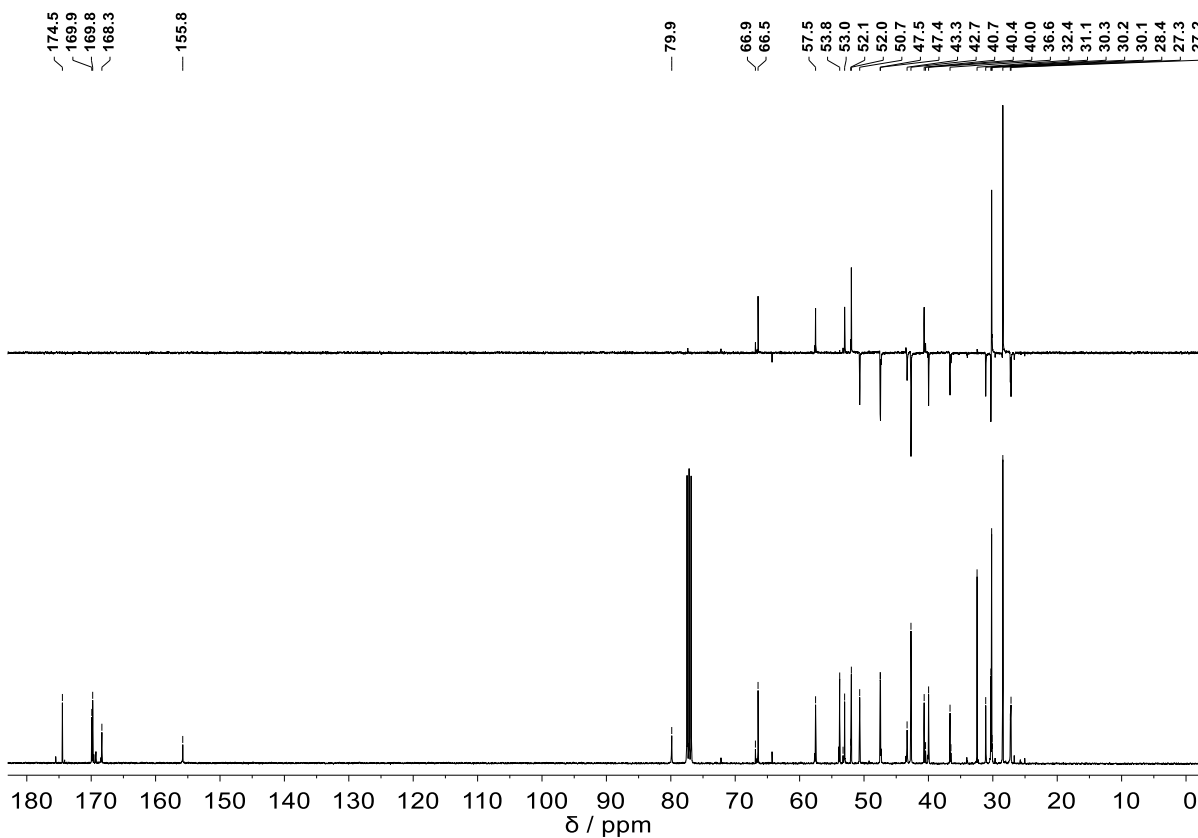

Figure S4. <sup>13</sup>C{<sup>1</sup>H}-NMR and DEPT-135 spectra (101 MHz, CDCl<sub>3</sub>) of conjugate **13b**.

Electronic Supplementary Information

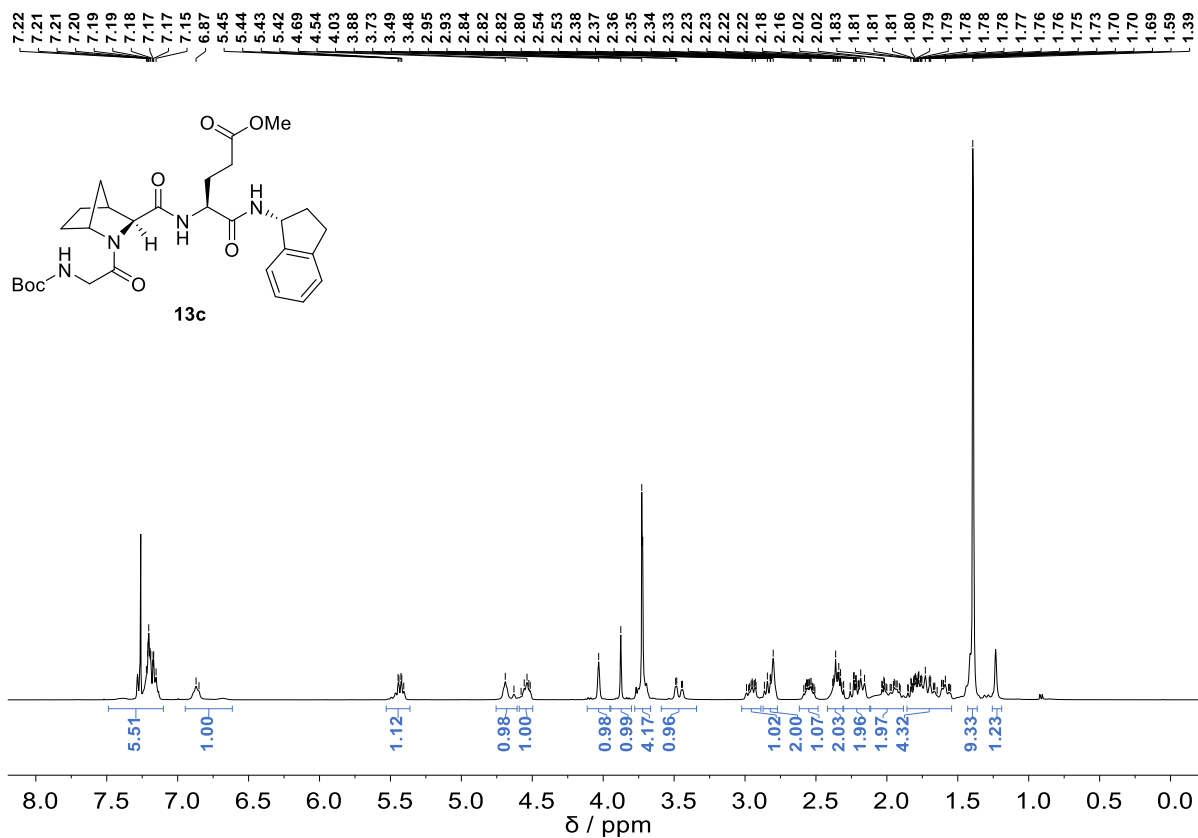

**Figure S5.**  $^1\text{H-NMR}$  spectrum (400 MHz,  $\text{CDCl}_3$ ) of conjugate **13c**.

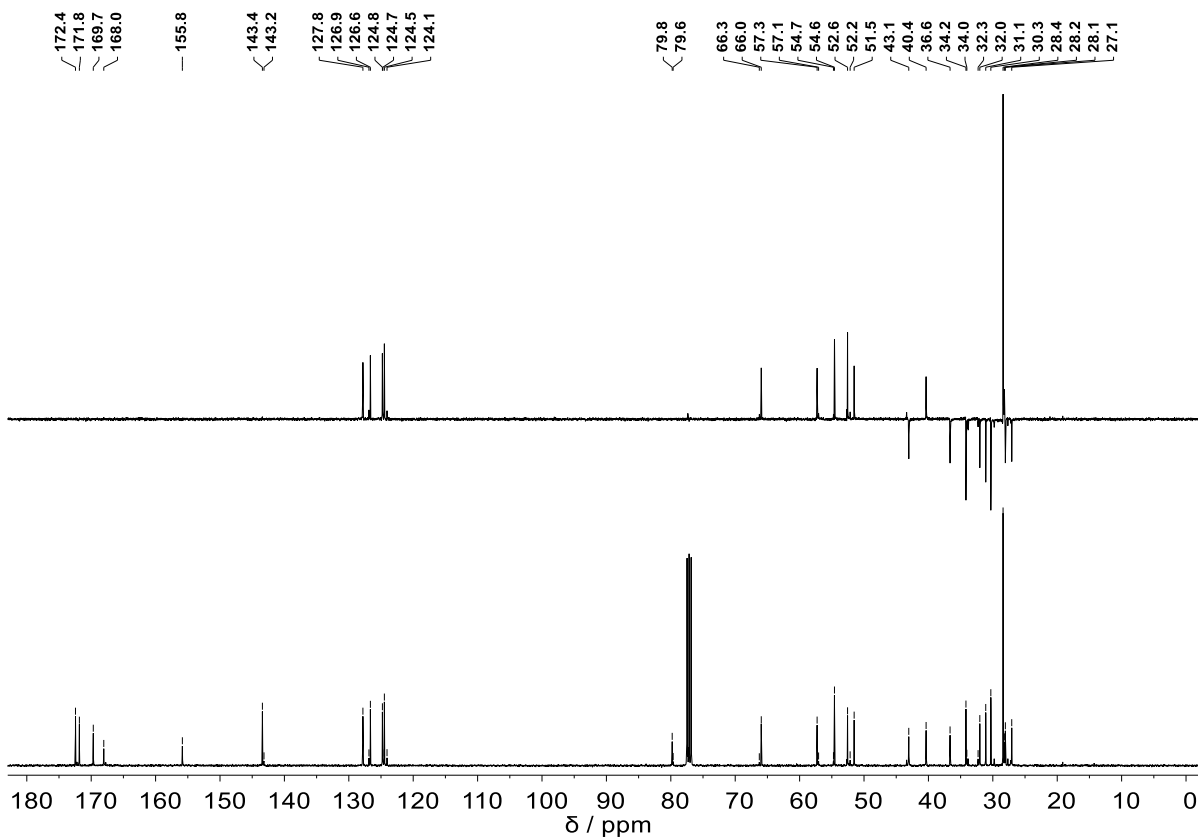

**Figure S6.**  $^{13}\text{C}\{^1\text{H}\}$ -NMR and DEPT-135 spectra (101 MHz,  $\text{CDCl}_3$ ) of conjugate **13c**.

Electronic Supplementary Information

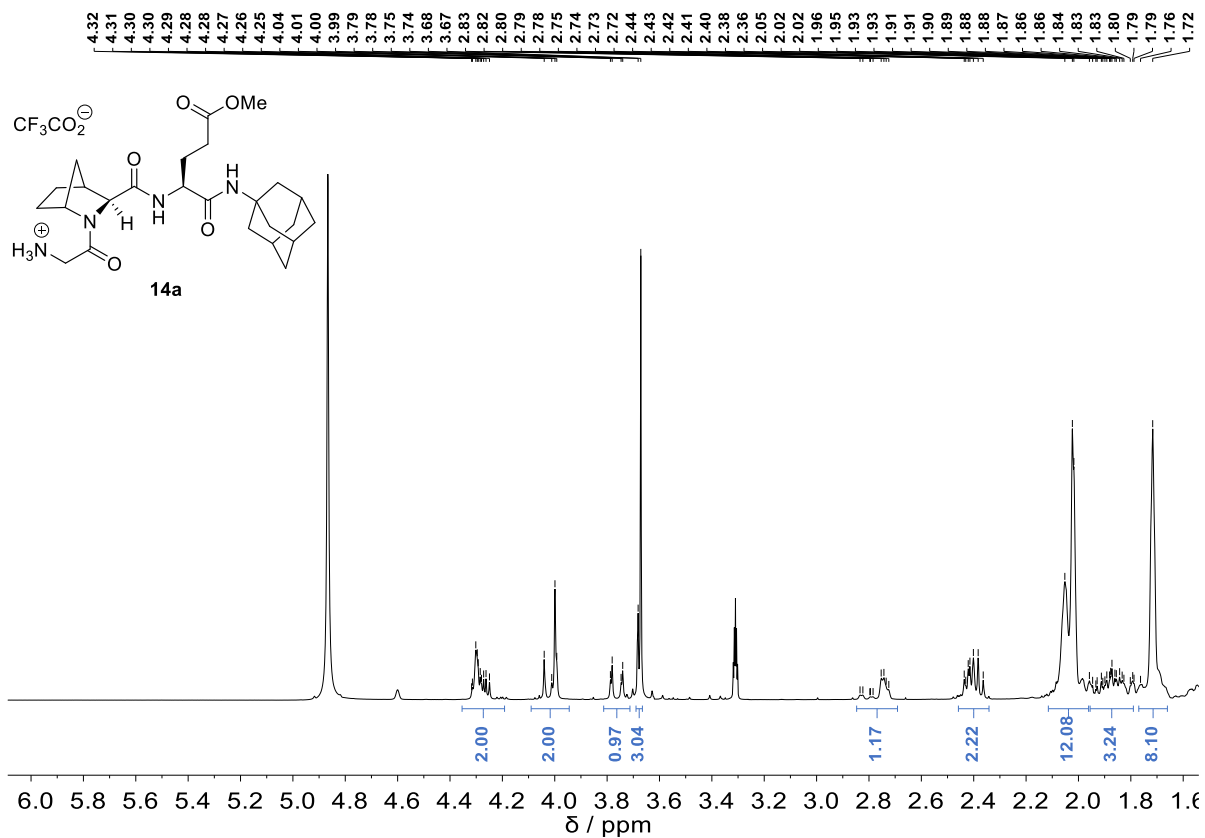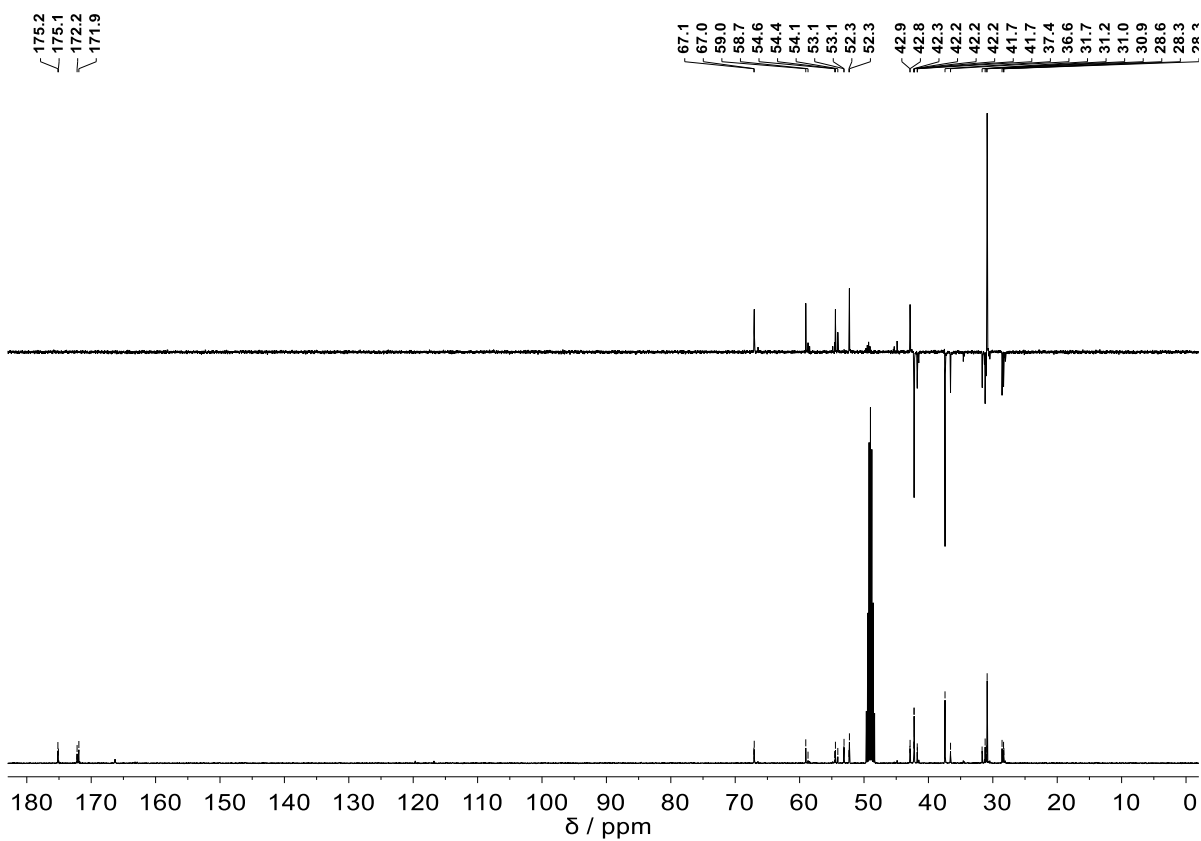

Electronic Supplementary Information

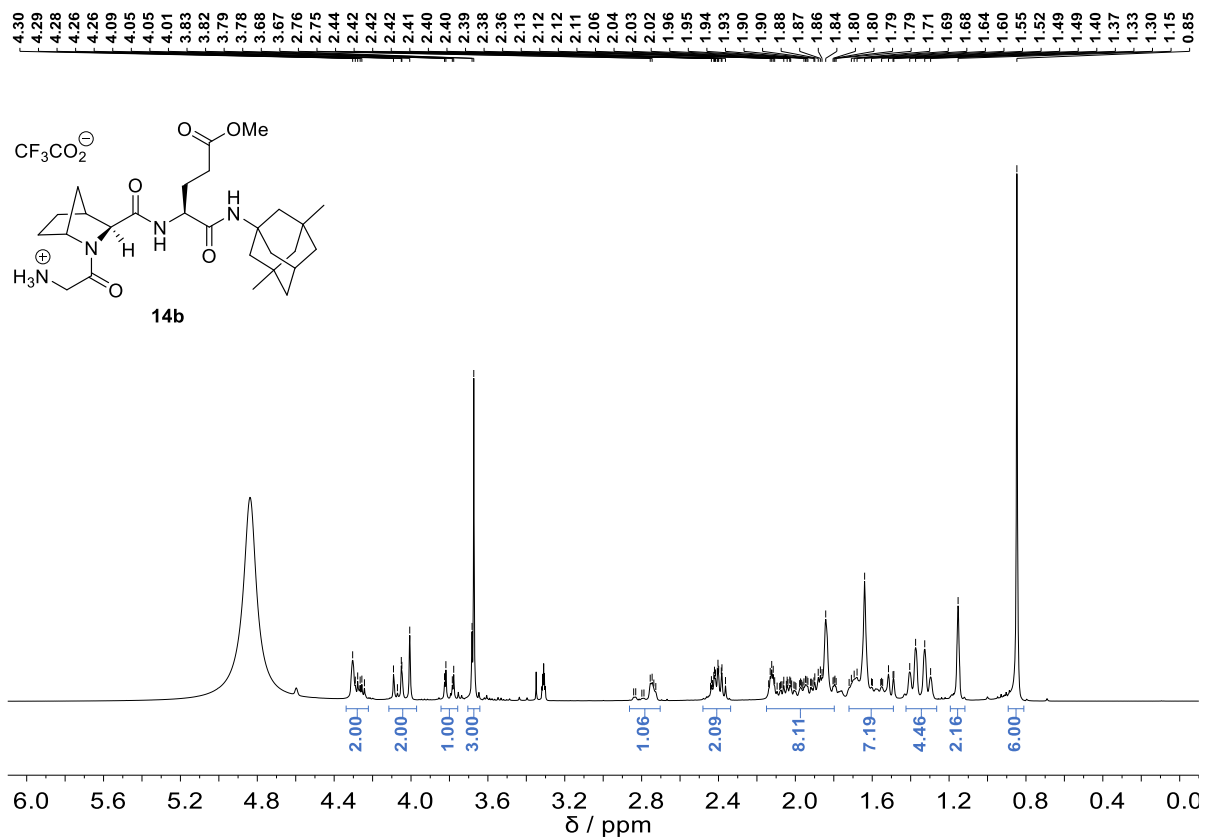

Figure S9.  $^1\text{H-NMR}$  spectrum (400 MHz,  $\text{CD}_3\text{OD}$ ) of conjugate **14b**.

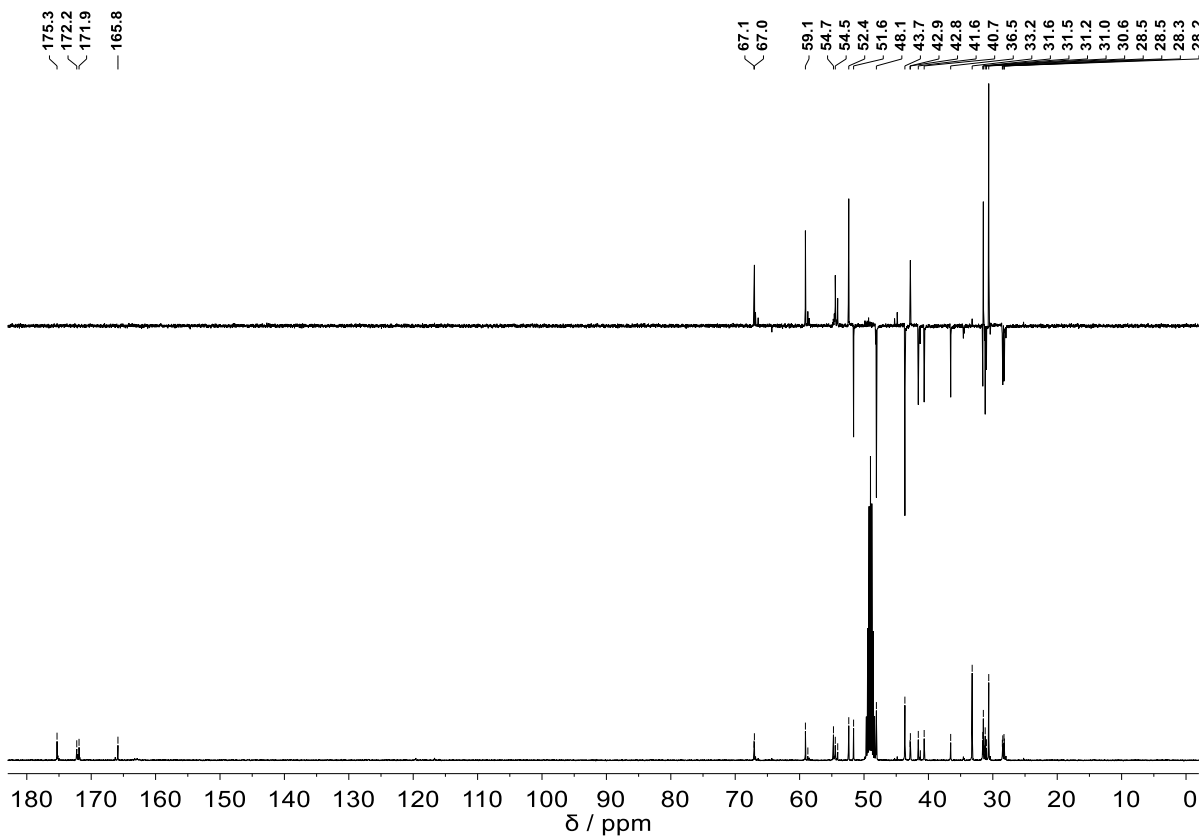

Figure S10.  $^{13}\text{C}\{^1\text{H}\}$ -NMR and DEPT-135 spectra (101 MHz,  $\text{CD}_3\text{OD}$ ) of conjugate **14b**.

Electronic Supplementary Information

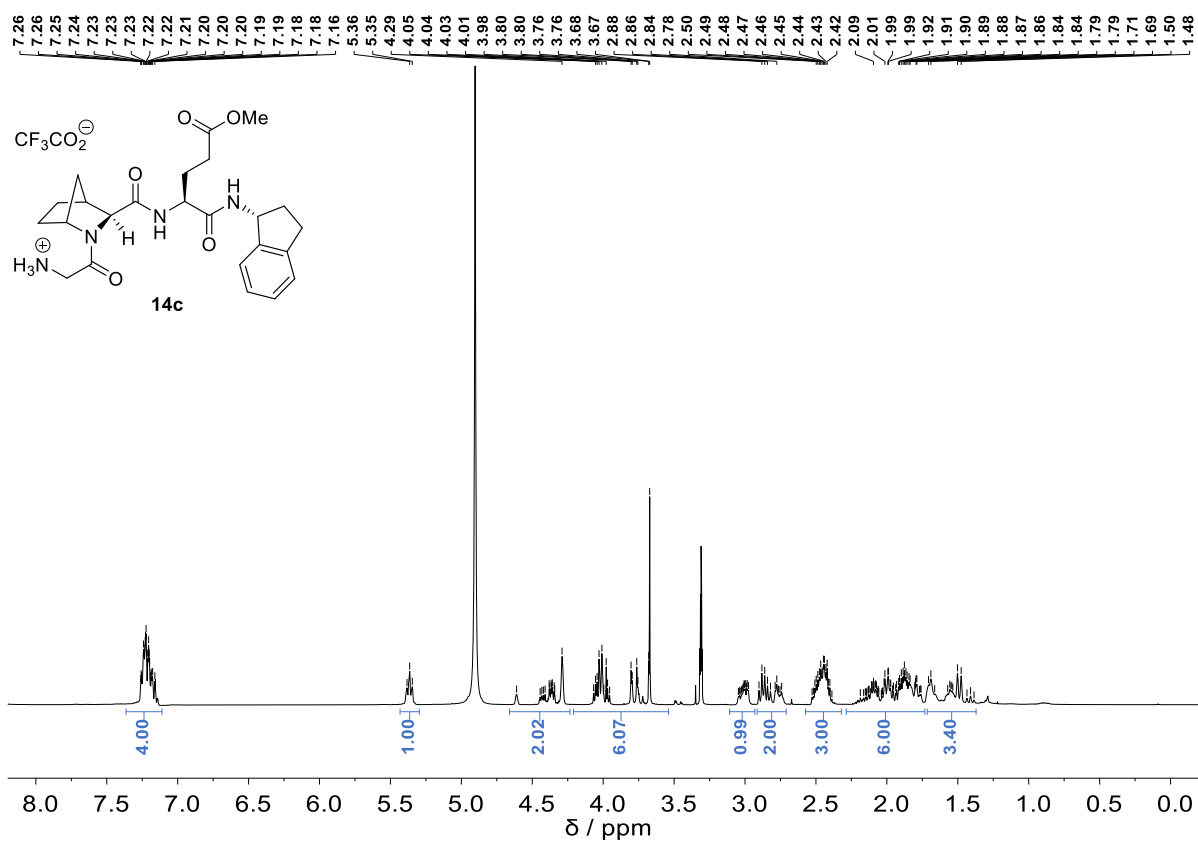

Figure S11.  $^1\text{H-NMR}$  spectrum (400 MHz,  $\text{CD}_3\text{OD}$ ) of conjugate **14c**.

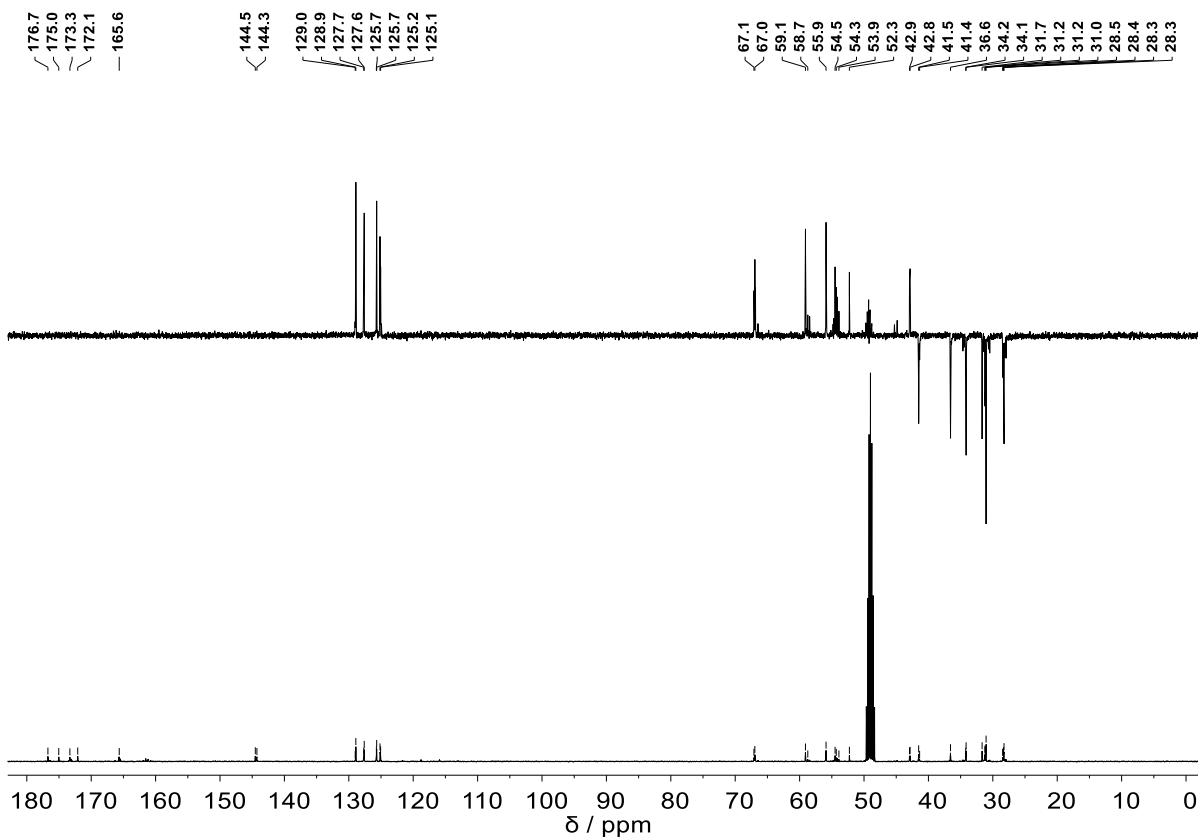

Figure S12.  $^{13}\text{C}\{^1\text{H}\}$ -NMR and DEPT-135 spectra (101 MHz,  $\text{CD}_3\text{OD}$ ) of conjugate **14c**.



Electronic Supplementary Information

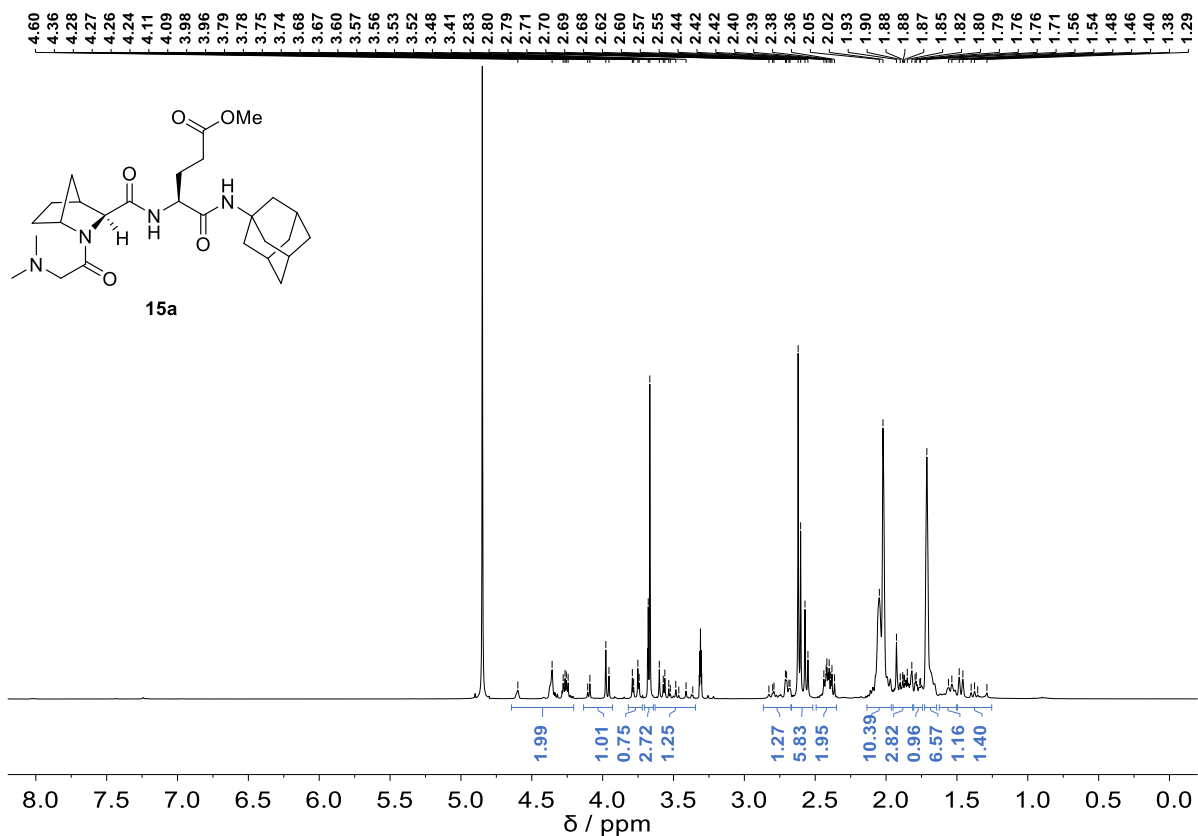

Figure S13. <sup>1</sup>H-NMR spectrum (400 MHz, CD<sub>3</sub>OD) of conjugate **15a**.

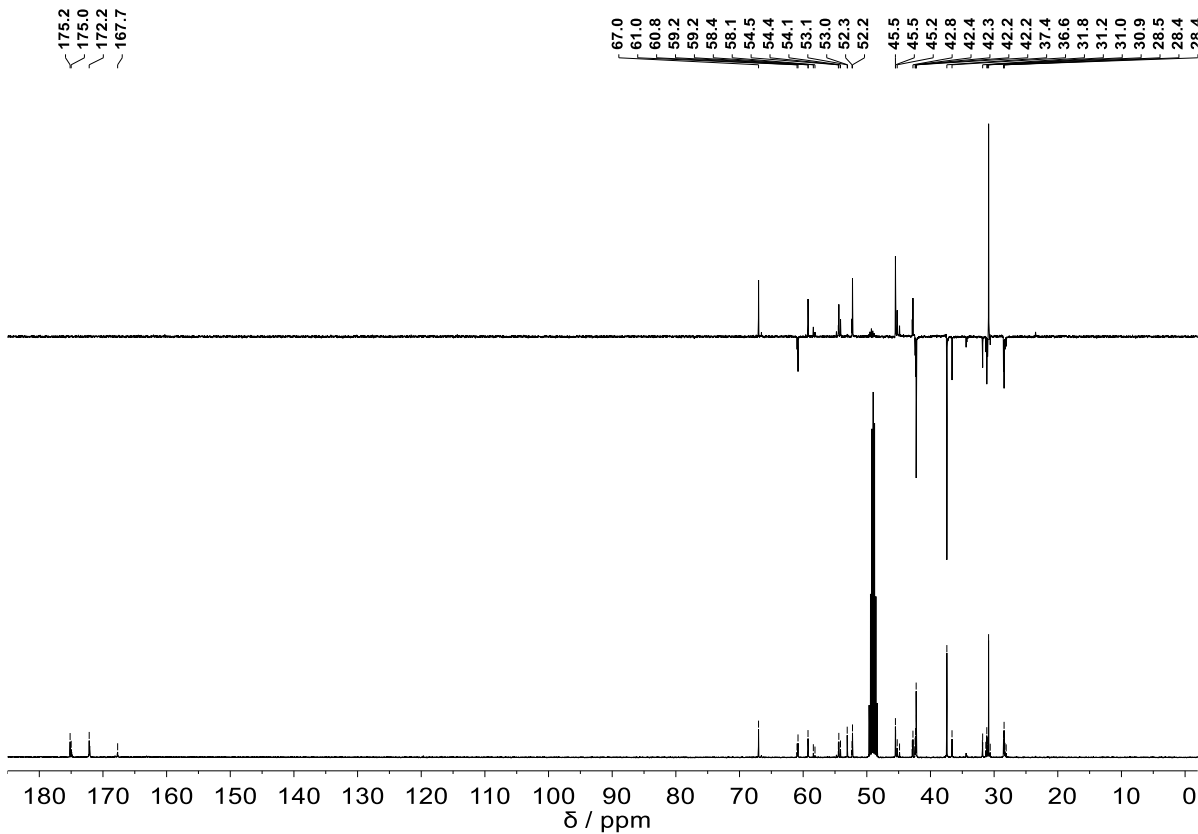

Figure S14. <sup>13</sup>C{<sup>1</sup>H}-NMR and DEPT-135 spectra (101 MHz, CD<sub>3</sub>OD) of conjugate **15a**.

Electronic Supplementary Information

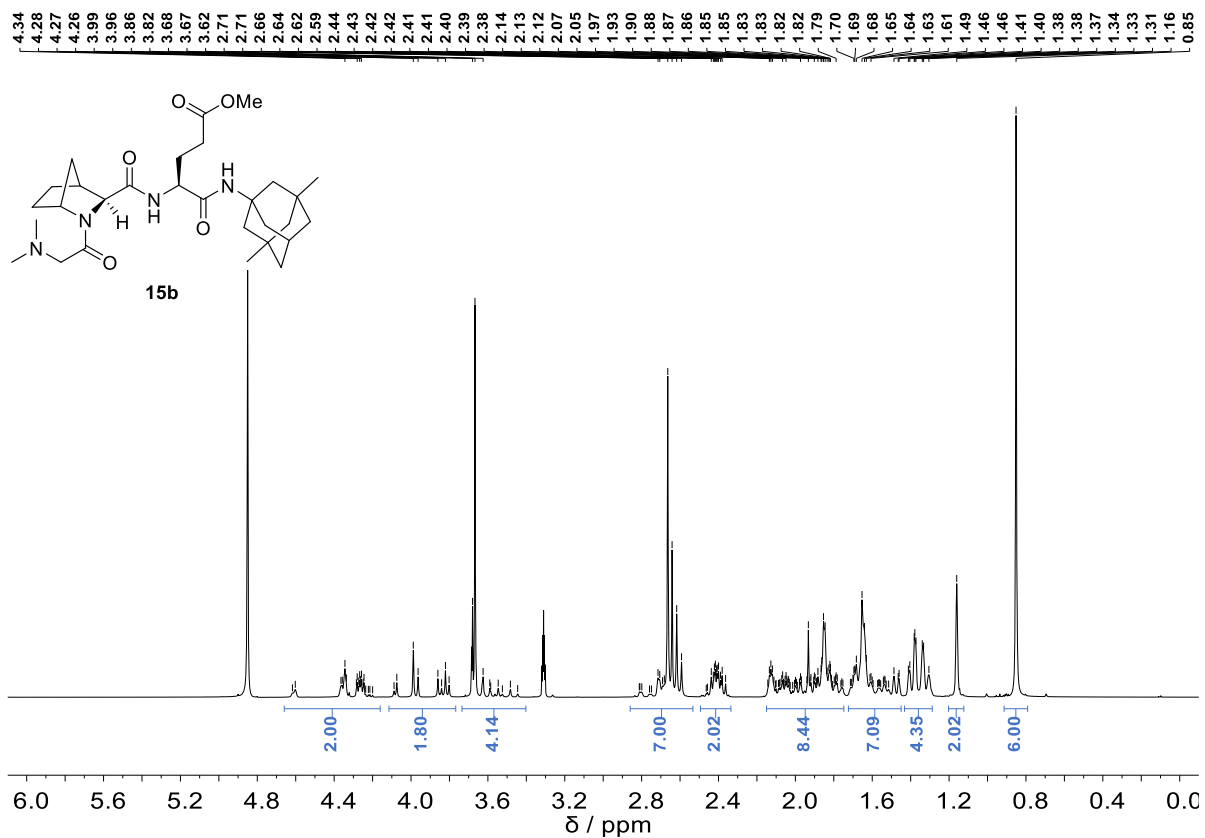

**Figure S15.**  $^1\text{H-NMR}$  spectrum (400 MHz,  $\text{CD}_3\text{OD}$ ) of conjugate **15b**.

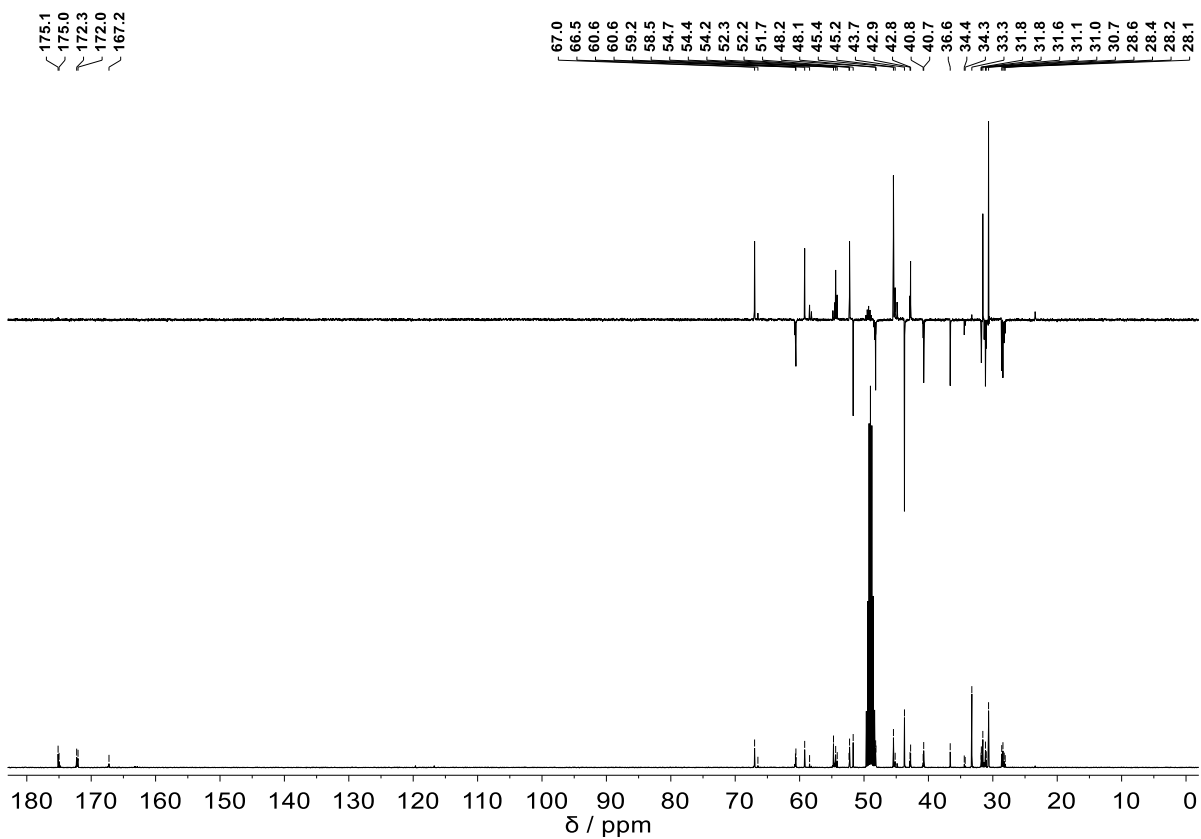

**Figure S16.**  $^{13}\text{C}\{^1\text{H}\}$ -NMR and DEPT-135 spectra (101 MHz,  $\text{CD}_3\text{OD}$ ) of conjugate **15b**.

Electronic Supplementary Information

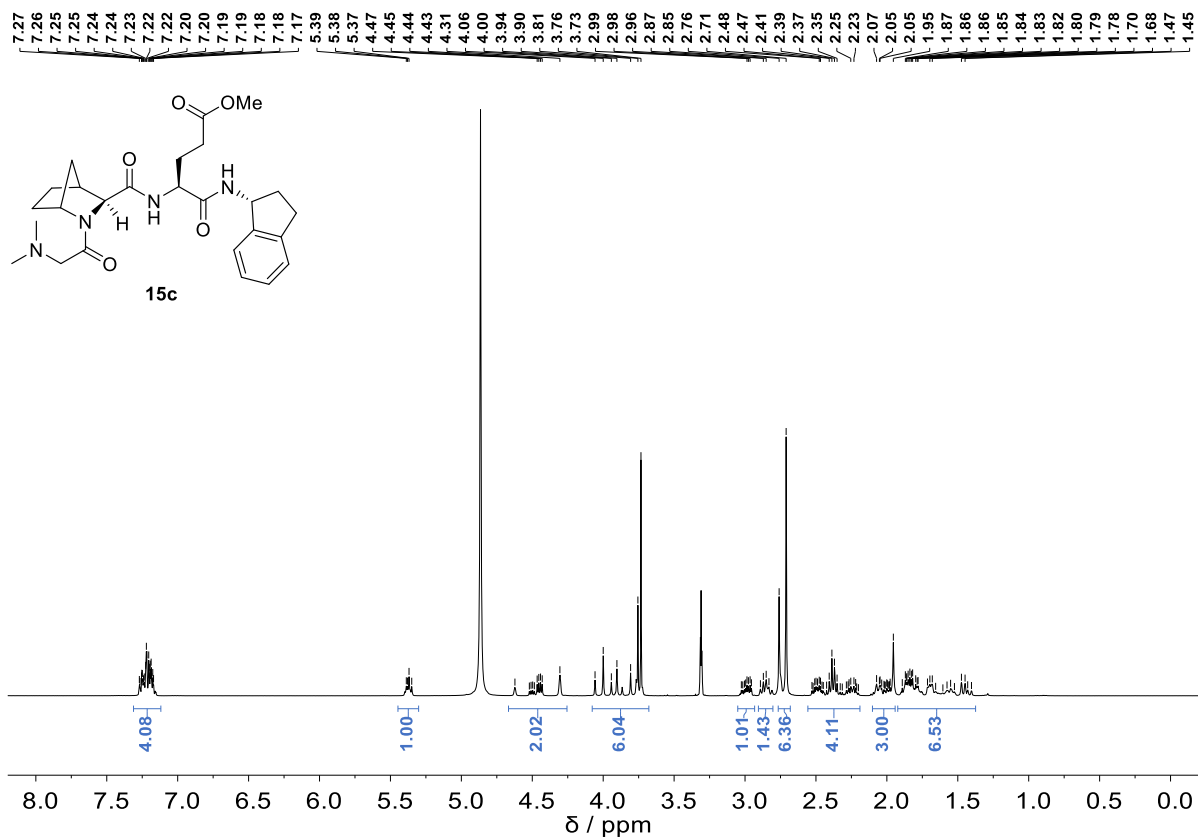

Figure S17.  $^1\text{H-NMR}$  spectrum (400 MHz,  $\text{CD}_3\text{OD}$ ) of conjugate **15c**.

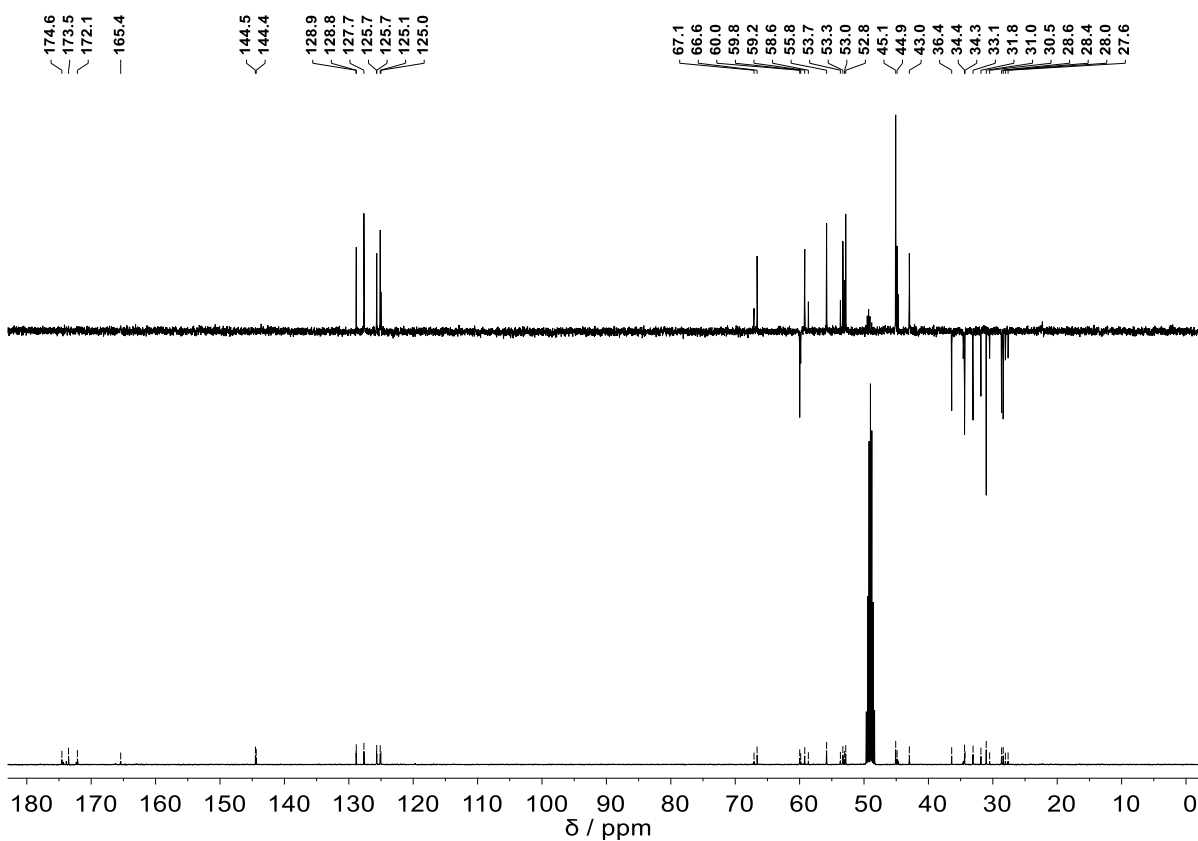

Figure S18.  $^{13}\text{C}\{^1\text{H}\}$ -NMR and DEPT-135 spectra (101 MHz,  $\text{CD}_3\text{OD}$ ) of conjugate **15c**.

Electronic Supplementary Information

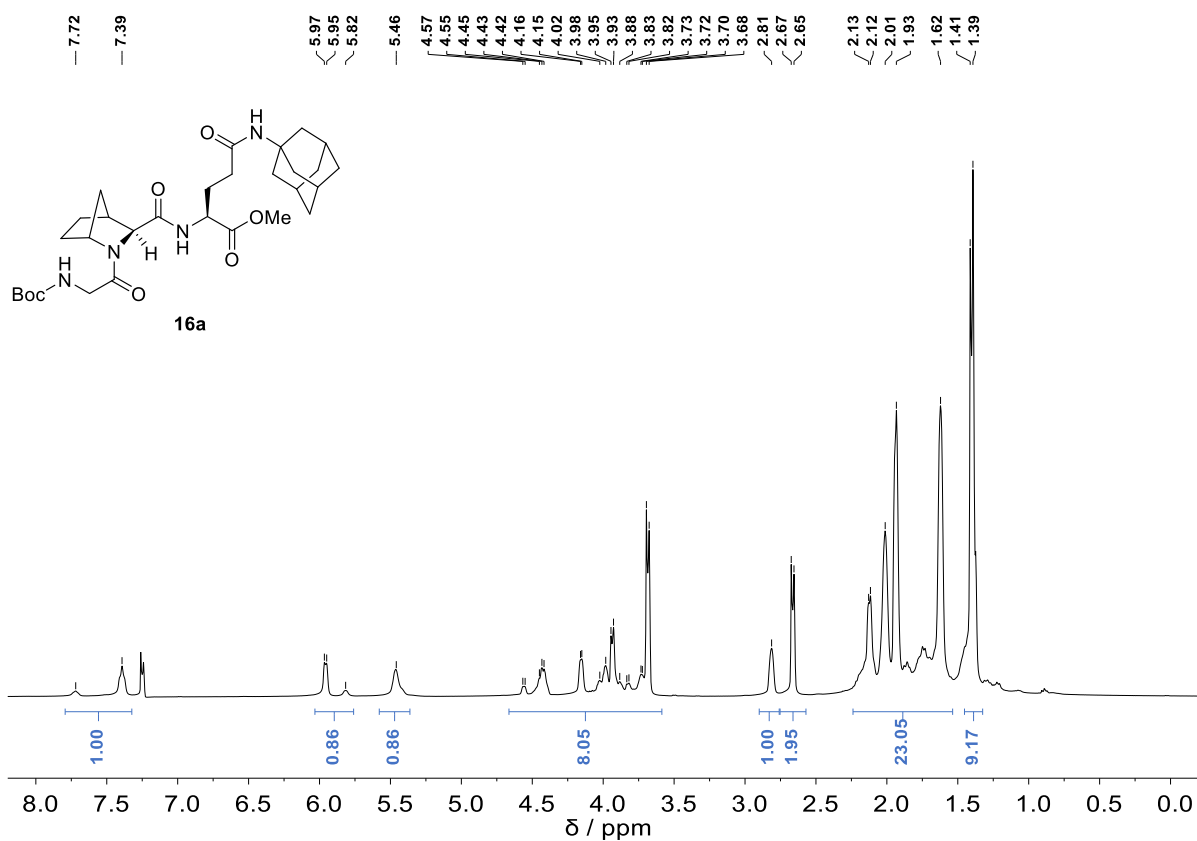

Figure S19. <sup>1</sup>H-NMR spectrum (400 MHz, CD<sub>3</sub>OD) of conjugate **16a**.

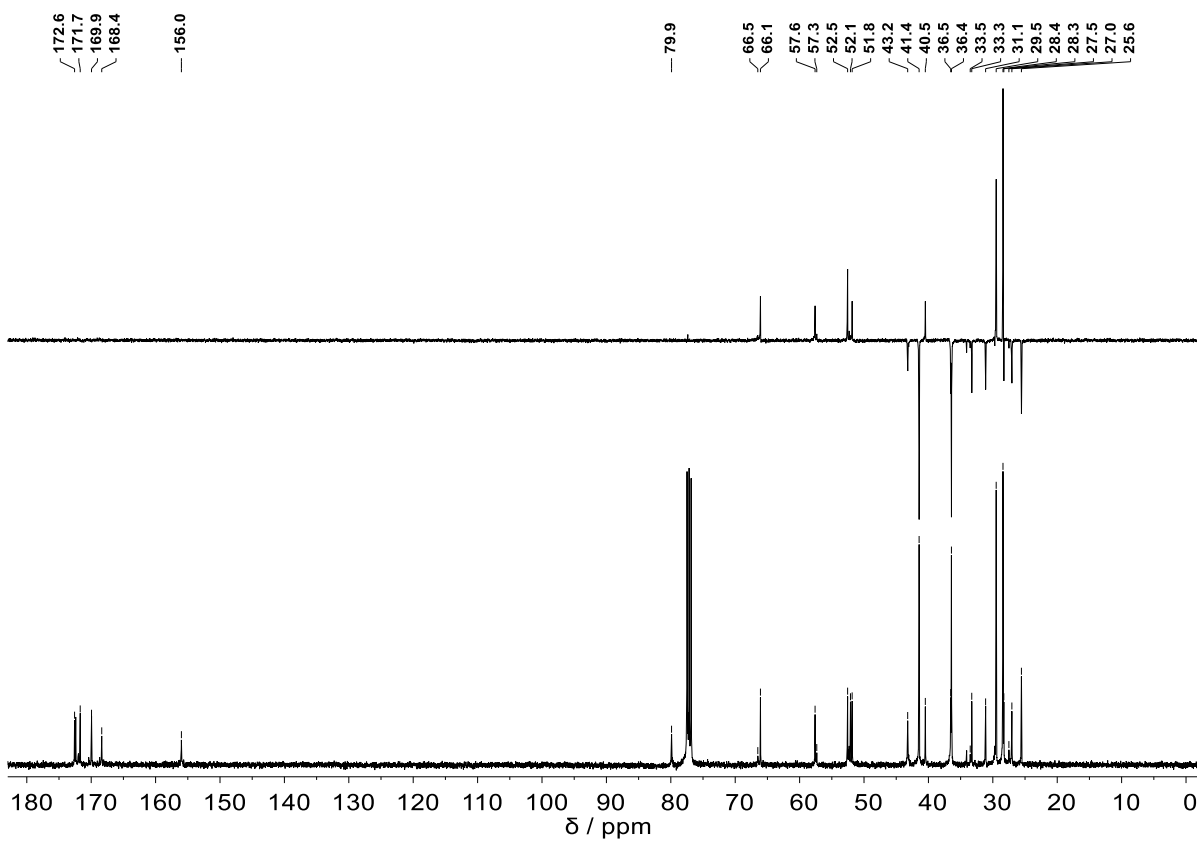

Figure S20. <sup>13</sup>C{<sup>1</sup>H}-NMR and DEPT-135 spectra (101 MHz, CD<sub>3</sub>OD) of conjugate **16a**.

Electronic Supplementary Information

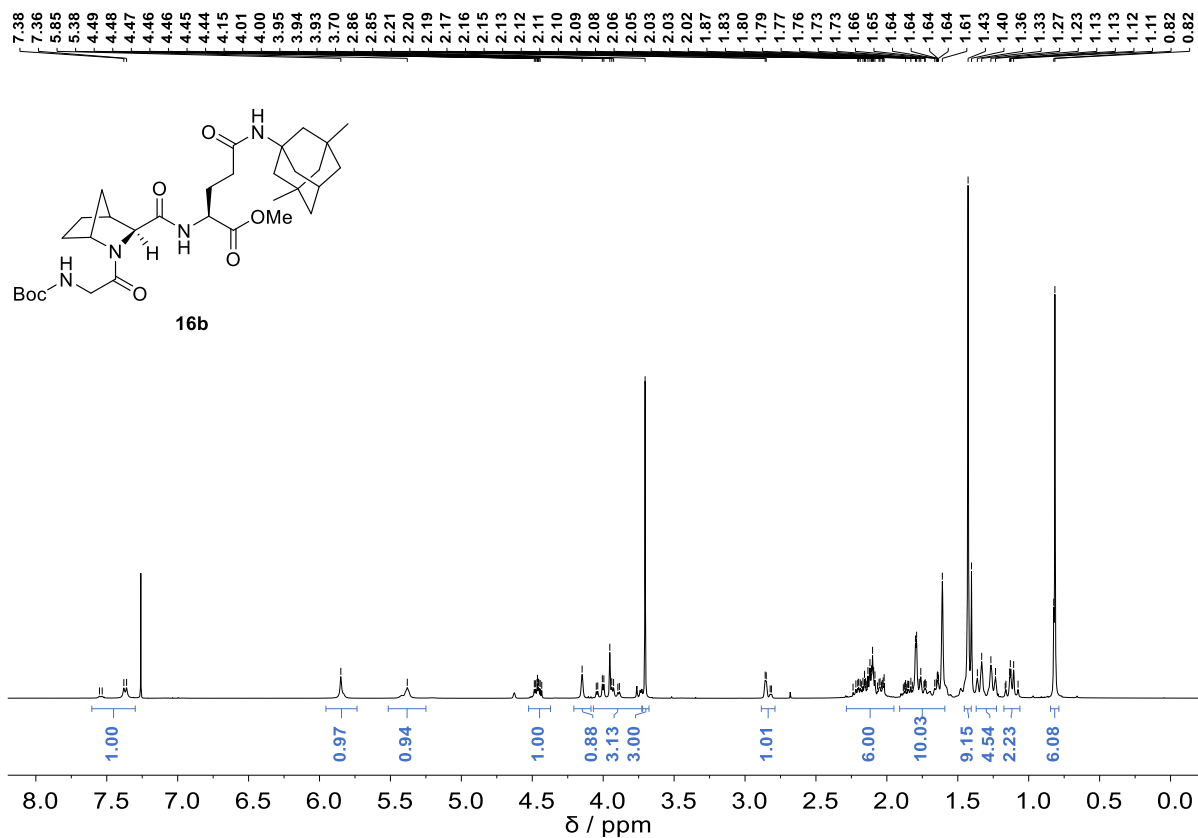

Figure S21.  $^1\text{H}$ -NMR spectrum (400 MHz,  $\text{CDCl}_3$ ) of conjugate **16b**.

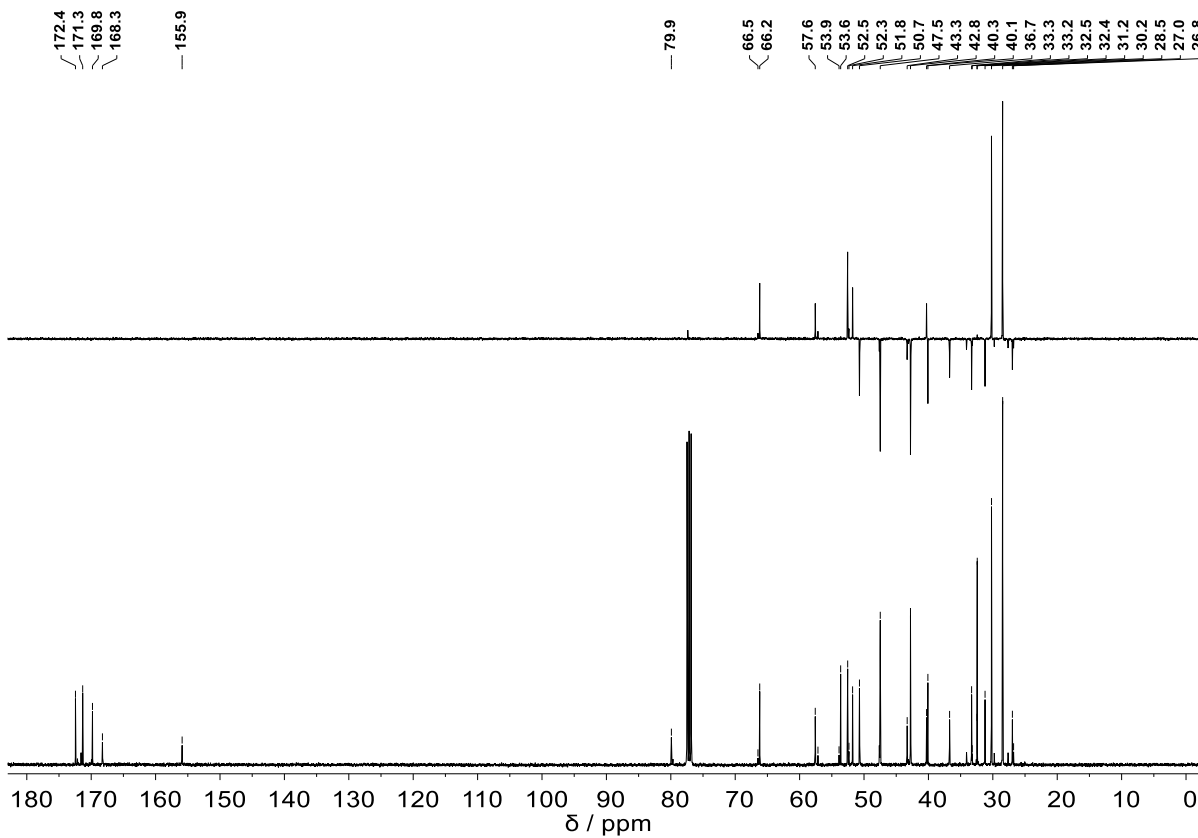

Figure S22.  $^{13}\text{C}\{^1\text{H}\}$ -NMR and DEPT-135 spectra (101 MHz,  $\text{CDCl}_3$ ) of conjugate **16b**.

Electronic Supplementary Information

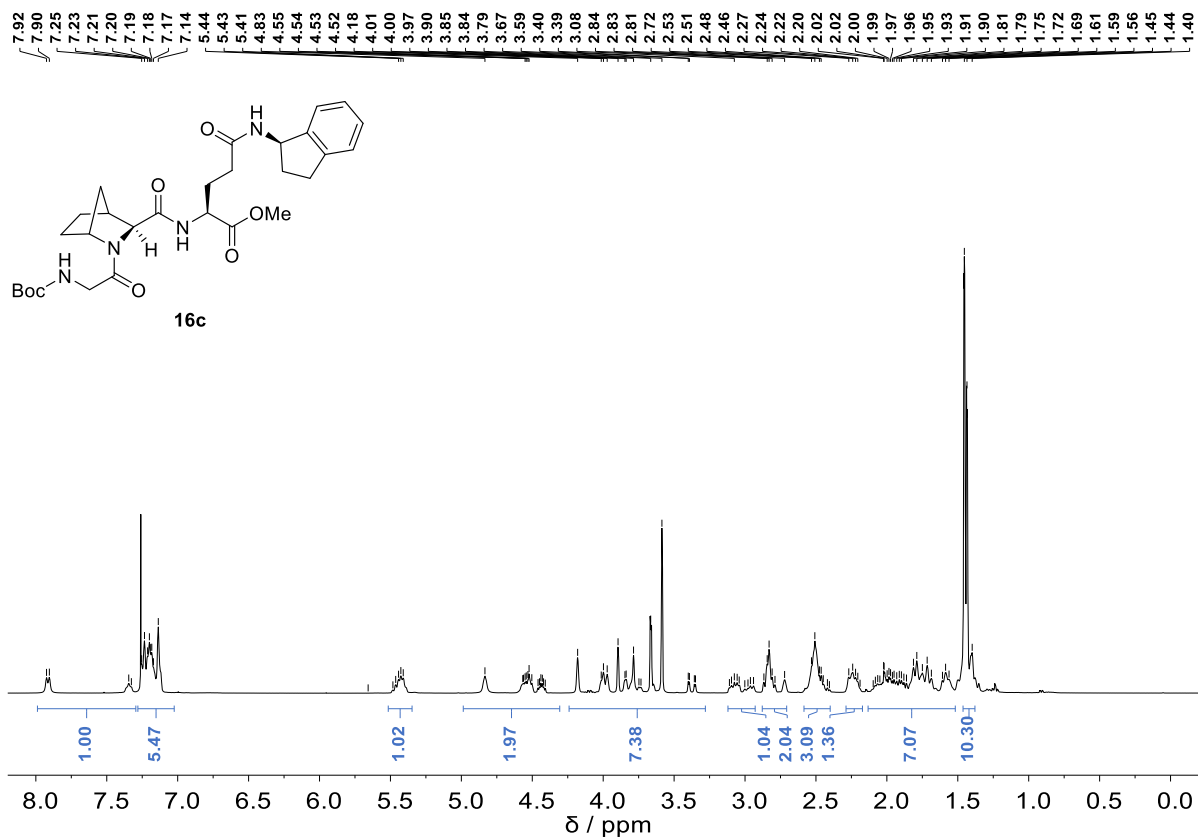

Figure S23.  $^1\text{H-NMR}$  spectrum (400 MHz,  $\text{CDCl}_3$ ) of conjugate **16c**.

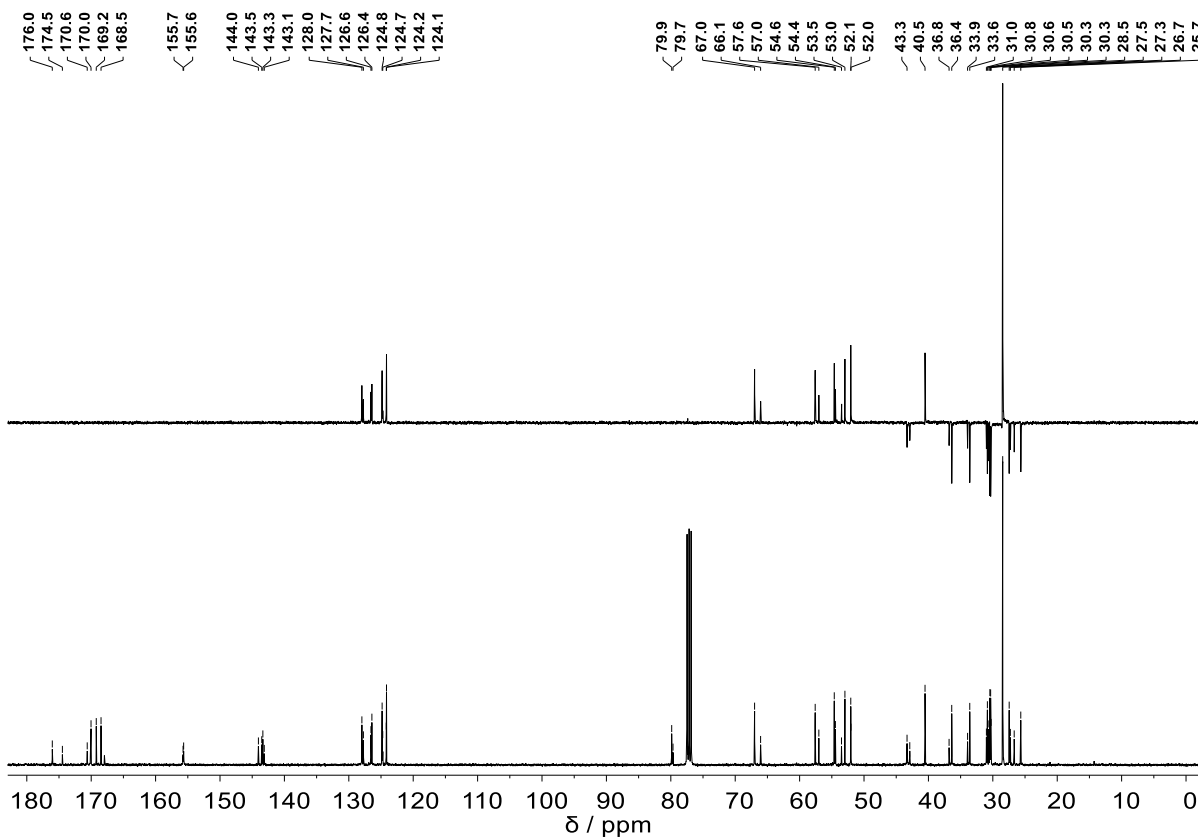

Figure S24.  $^{13}\text{C}\{^1\text{H}\}$ -NMR and DEPT-135 spectra (101 MHz,  $\text{CDCl}_3$ ) of conjugate **16c**.

Electronic Supplementary Information

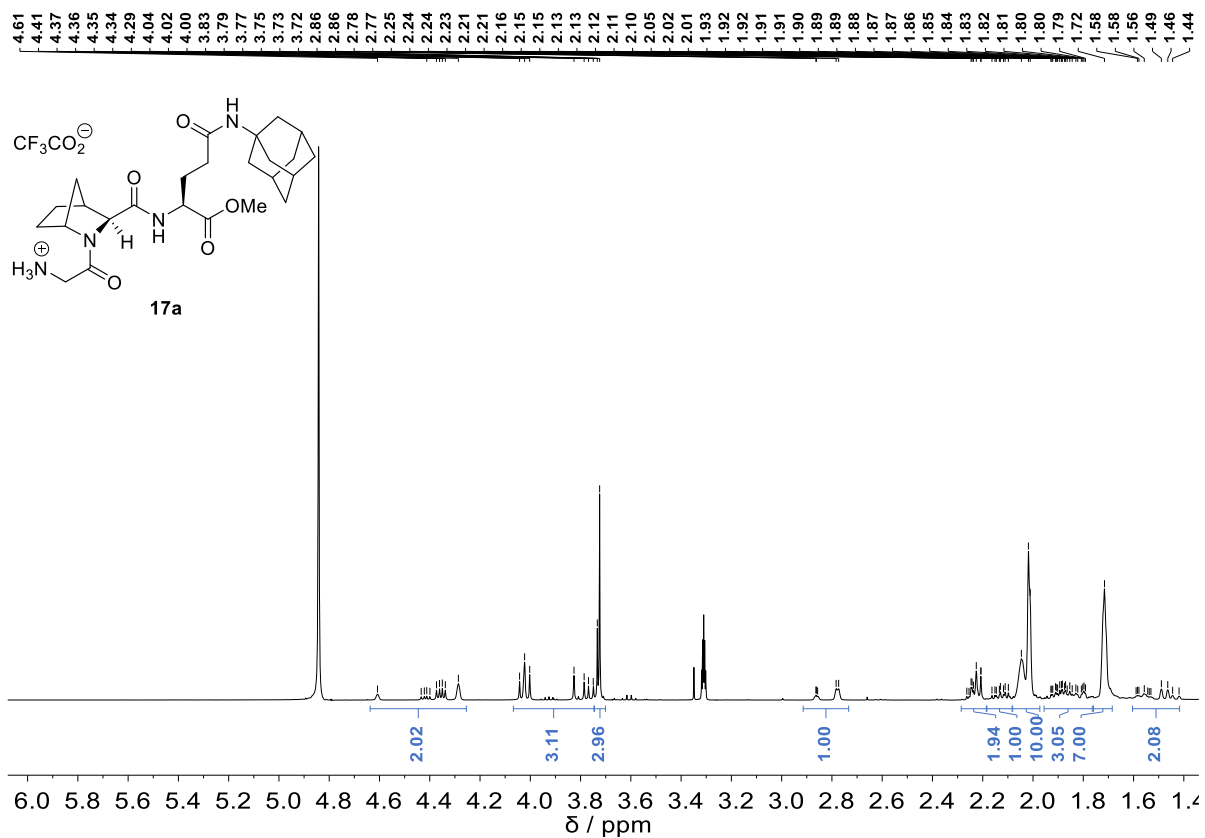

Figure S25.  $^1\text{H-NMR}$  spectrum (400 MHz,  $\text{CD}_3\text{OD}$ ) of conjugate **17a**.

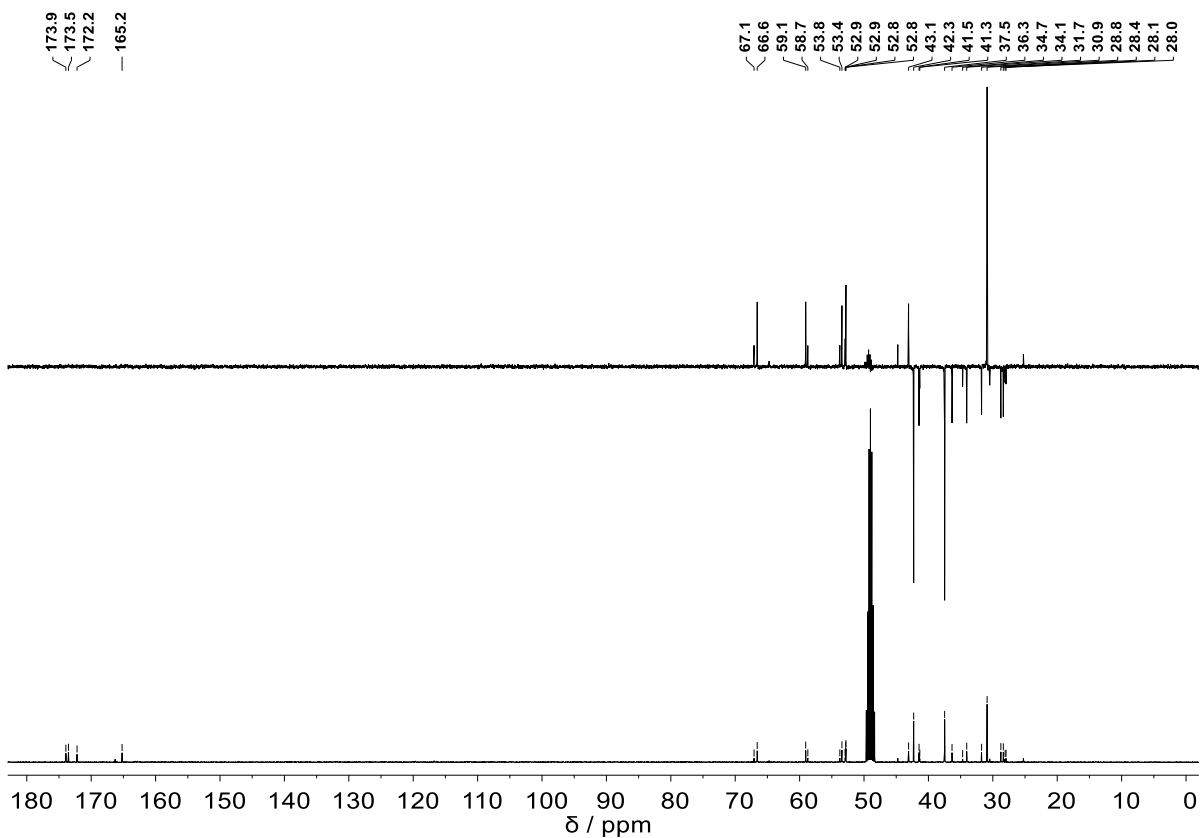

Figure S26.  $^{13}\text{C}\{^1\text{H}\}$ -NMR and DEPT-135 spectra (101 MHz,  $\text{CD}_3\text{OD}$ ) of conjugate **17a**.

Electronic Supplementary Information

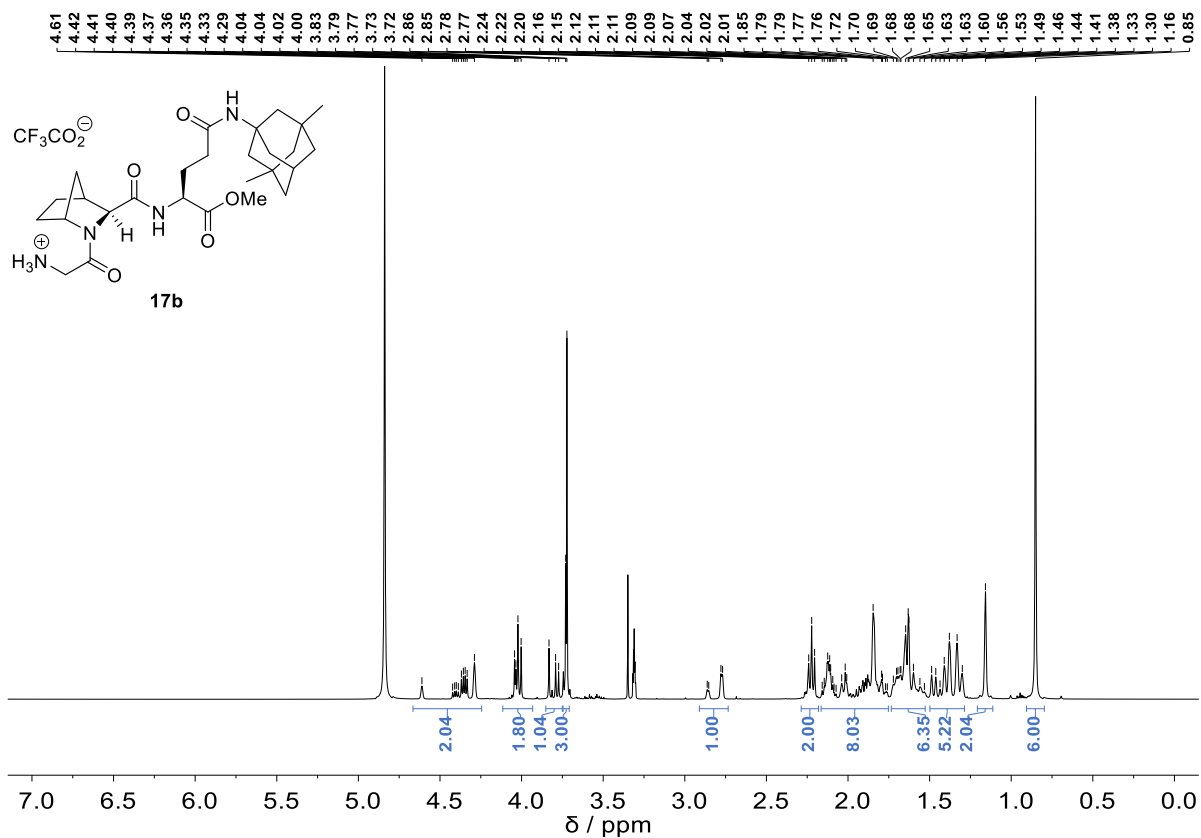

Figure S27.  $^1\text{H-NMR}$  spectrum (400 MHz,  $\text{CD}_3\text{OD}$ ) of conjugate **17b**.

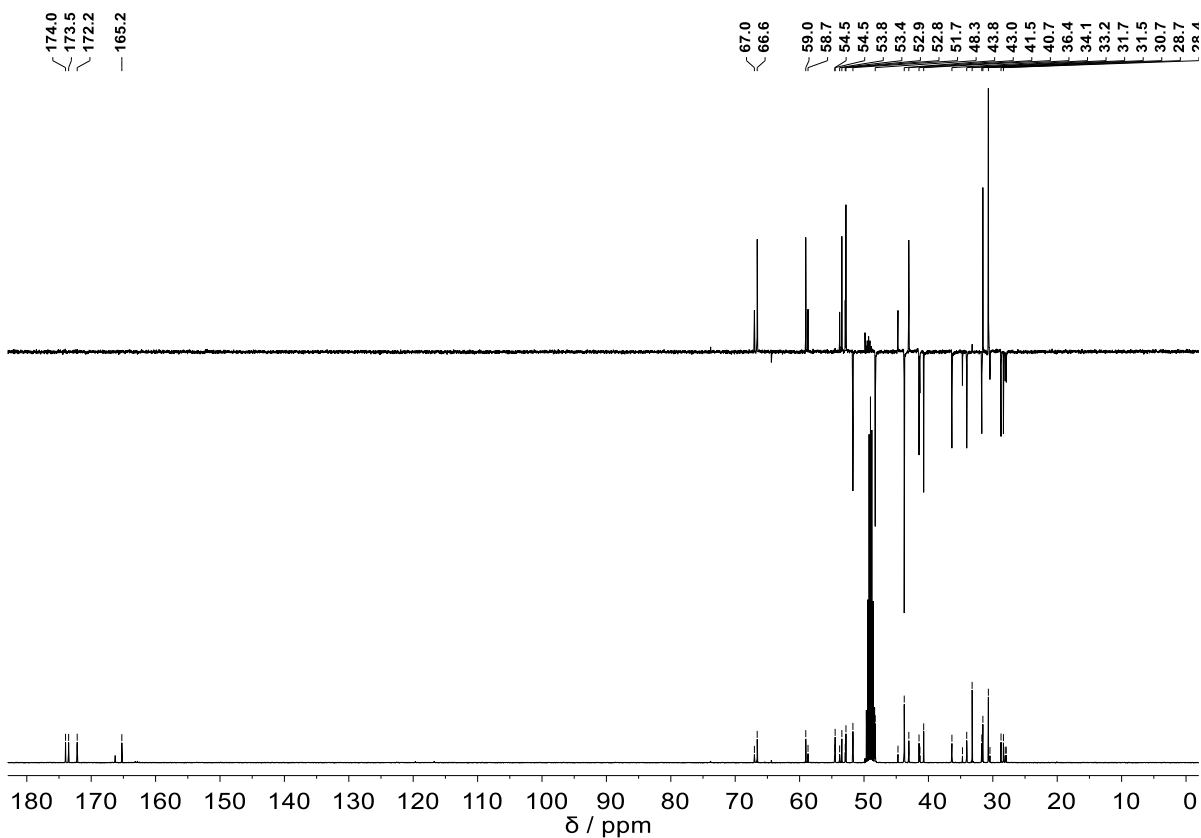

Figure S28.  $^{13}\text{C}\{^1\text{H}\}$ -NMR and DEPT-135 spectra (101 MHz,  $\text{CD}_3\text{OD}$ ) of conjugate **17b**.



Electronic Supplementary Information

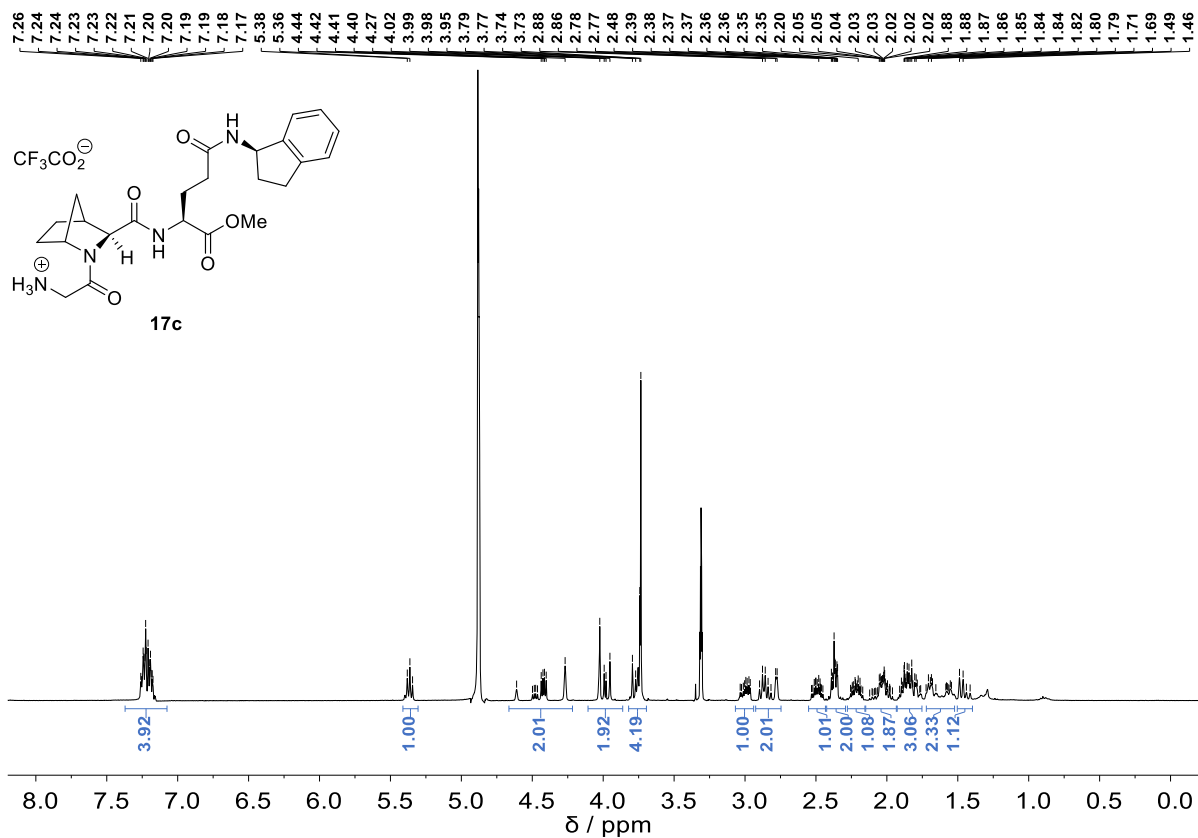

Figure S29. <sup>1</sup>H-NMR spectrum (400 MHz, CD<sub>3</sub>OD) of conjugate **17c**.

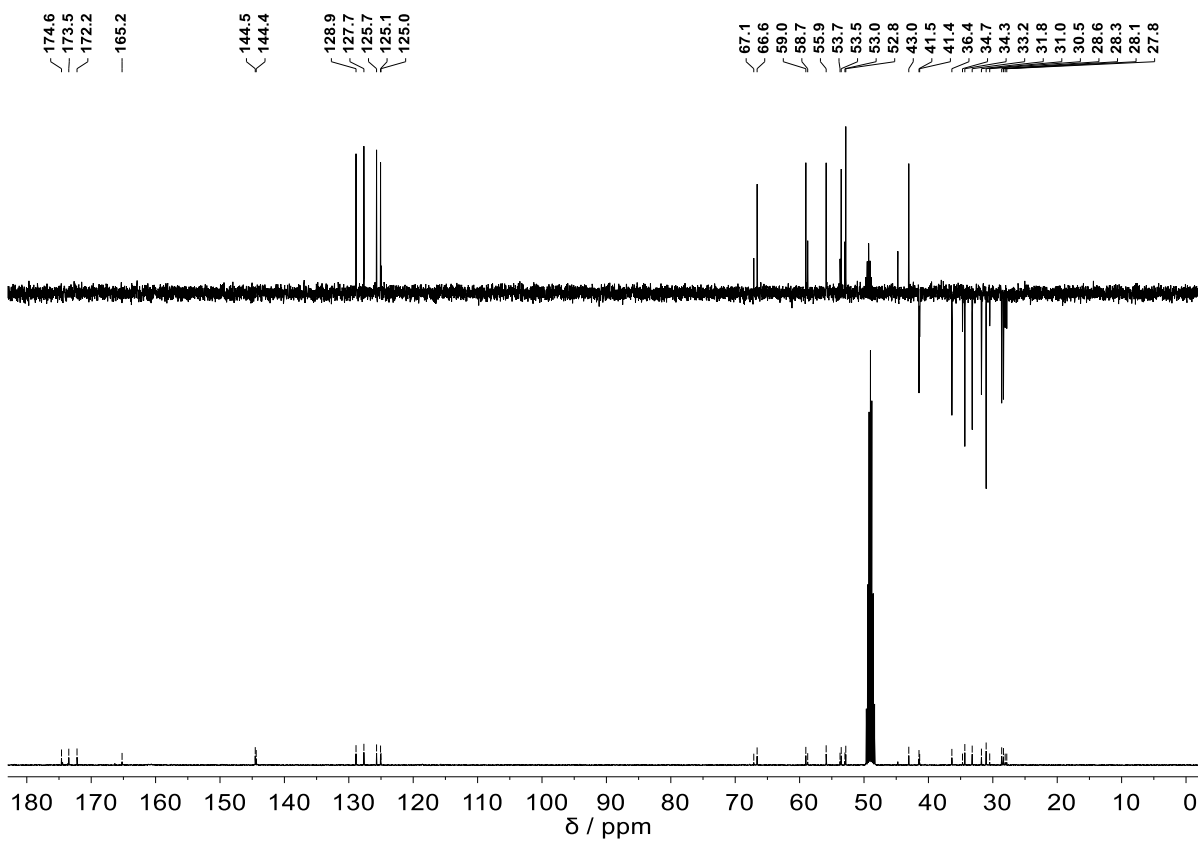

Figure S30. <sup>13</sup>C{<sup>1</sup>H}-NMR and DEPT-135 spectra (101 MHz, CD<sub>3</sub>OD) of conjugate **17c**.

Electronic Supplementary Information

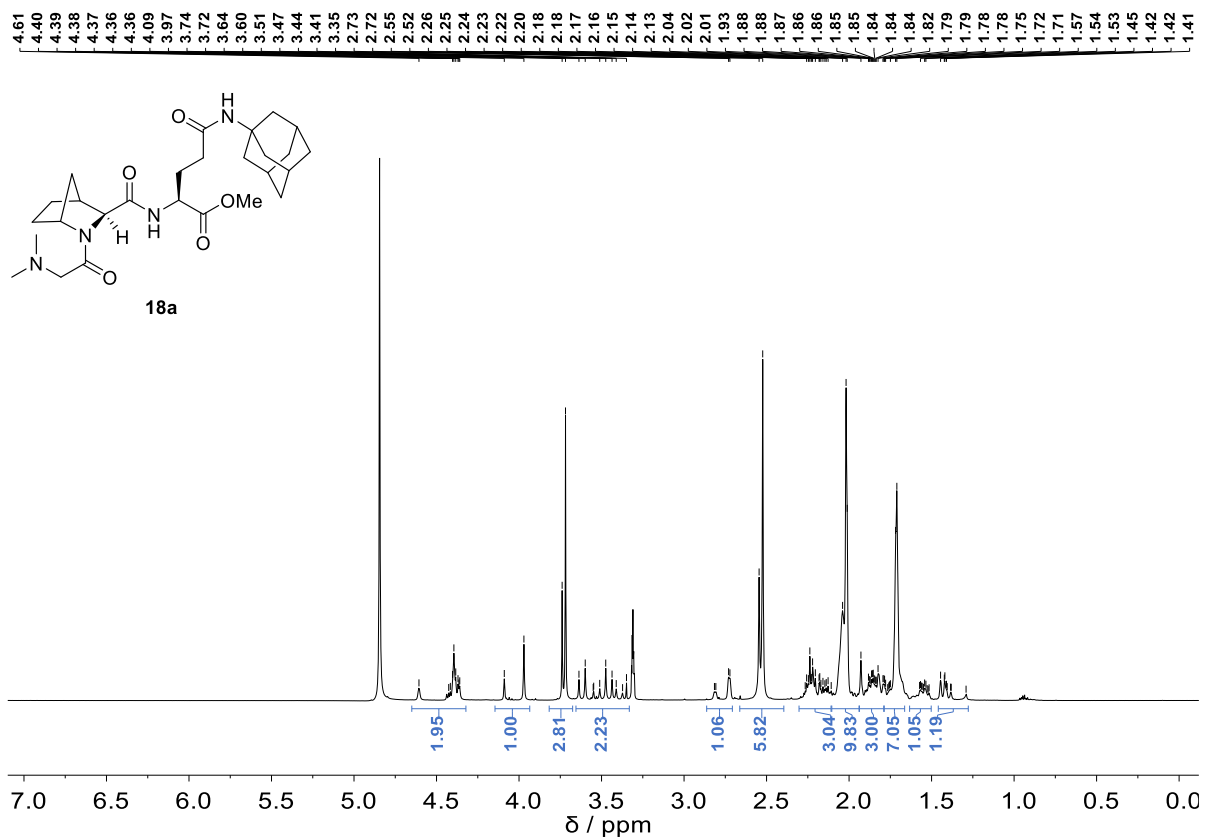

Figure S31. <sup>1</sup>H-NMR spectrum (400 MHz, CD<sub>3</sub>OD) of conjugate **18a**.

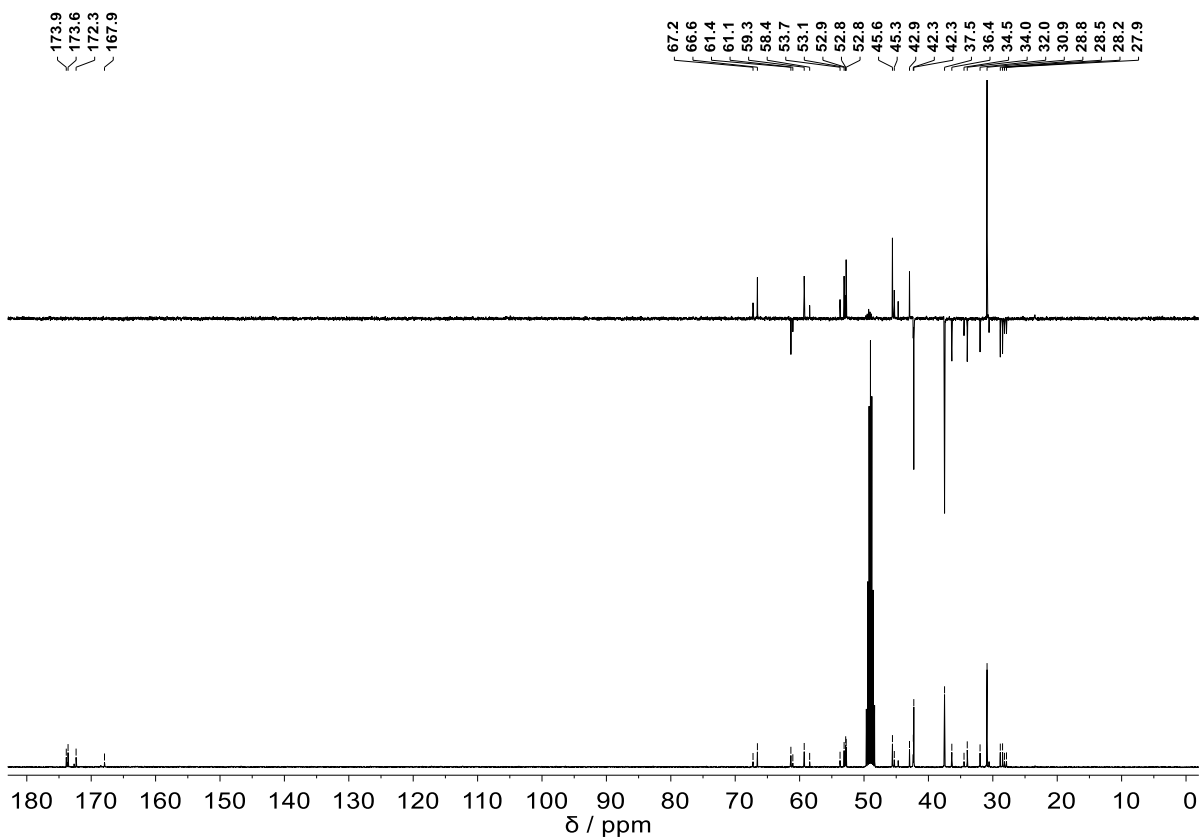

Figure S32. <sup>13</sup>C{<sup>1</sup>H}-NMR and DEPT-135 spectra (101 MHz, CDCl<sub>3</sub>) of conjugate **18a**.

Electronic Supplementary Information

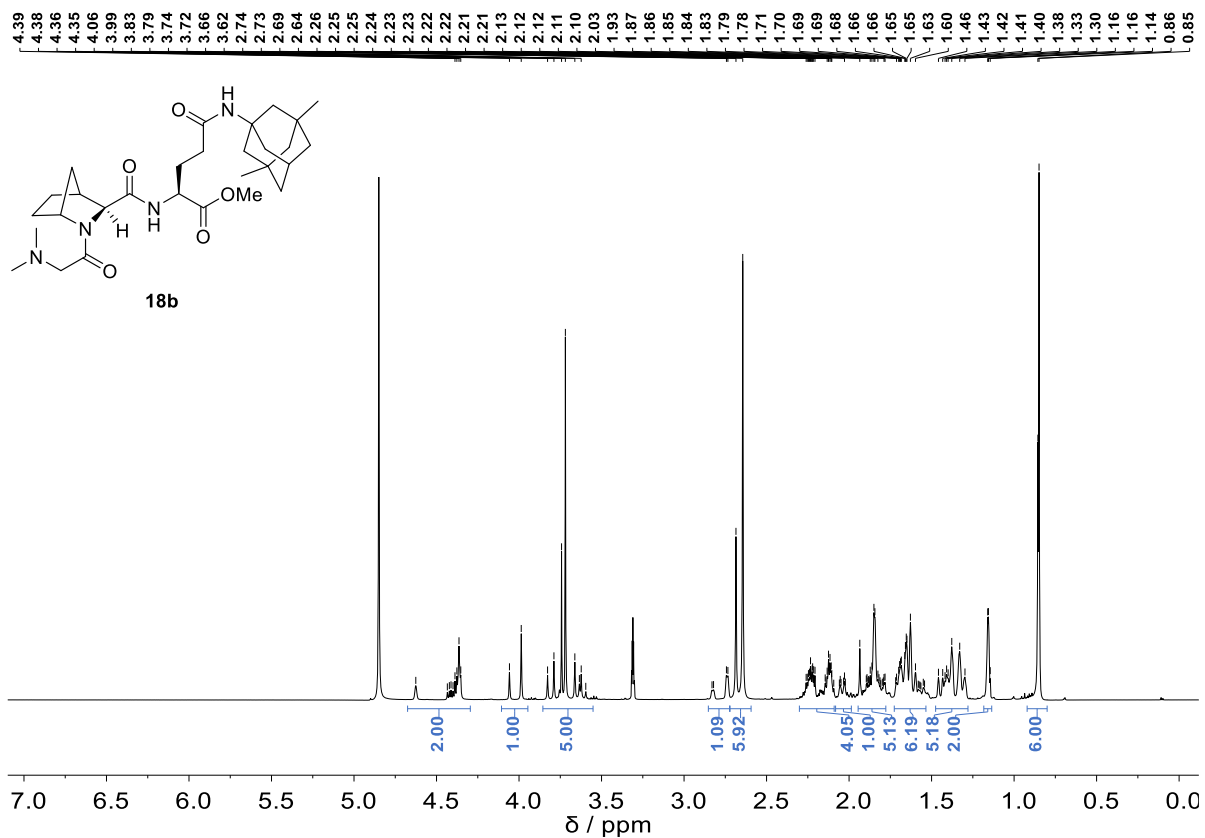

Figure S33.  $^1\text{H-NMR}$  spectrum (400 MHz,  $\text{CD}_3\text{OD}$ ) of conjugate **18b**.

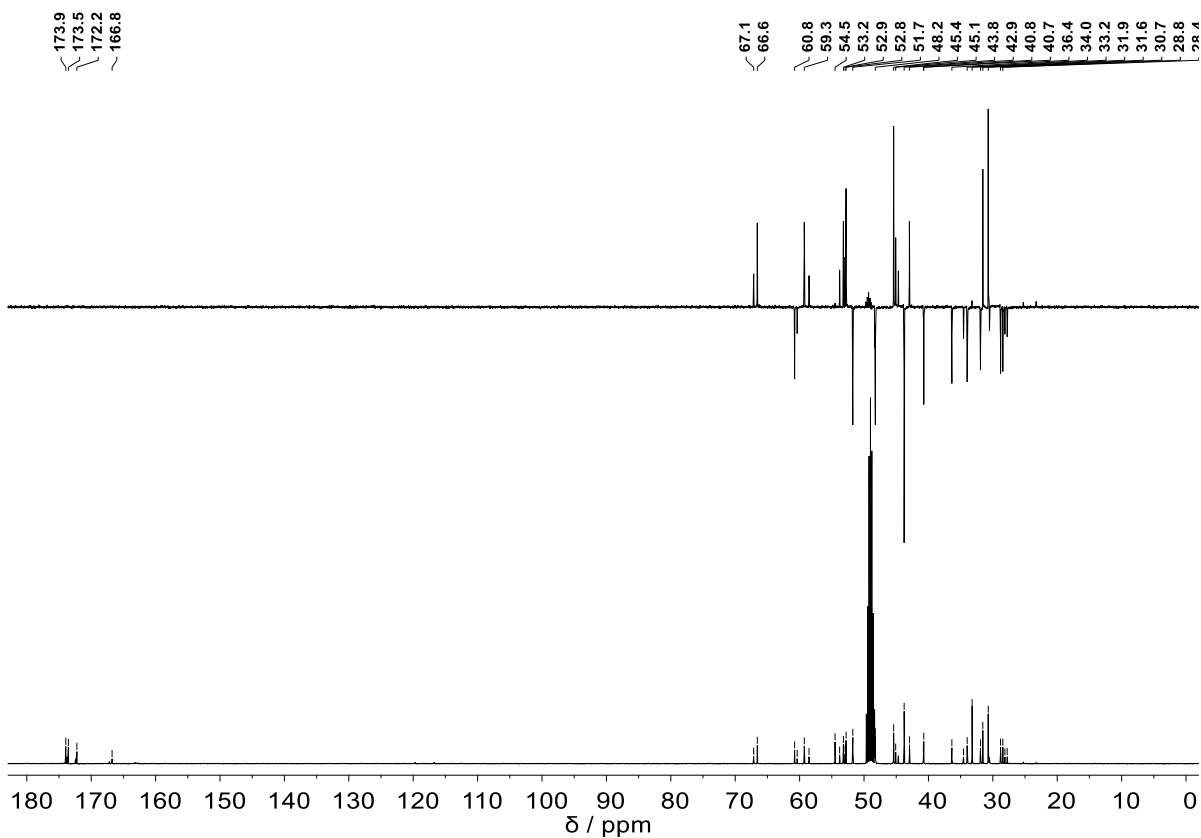

Figure S34.  $^{13}\text{C}\{^1\text{H}\}$ -NMR and DEPT-135 spectra (101 MHz,  $\text{CD}_3\text{OD}$ ) of conjugate **18b**.

Electronic Supplementary Information

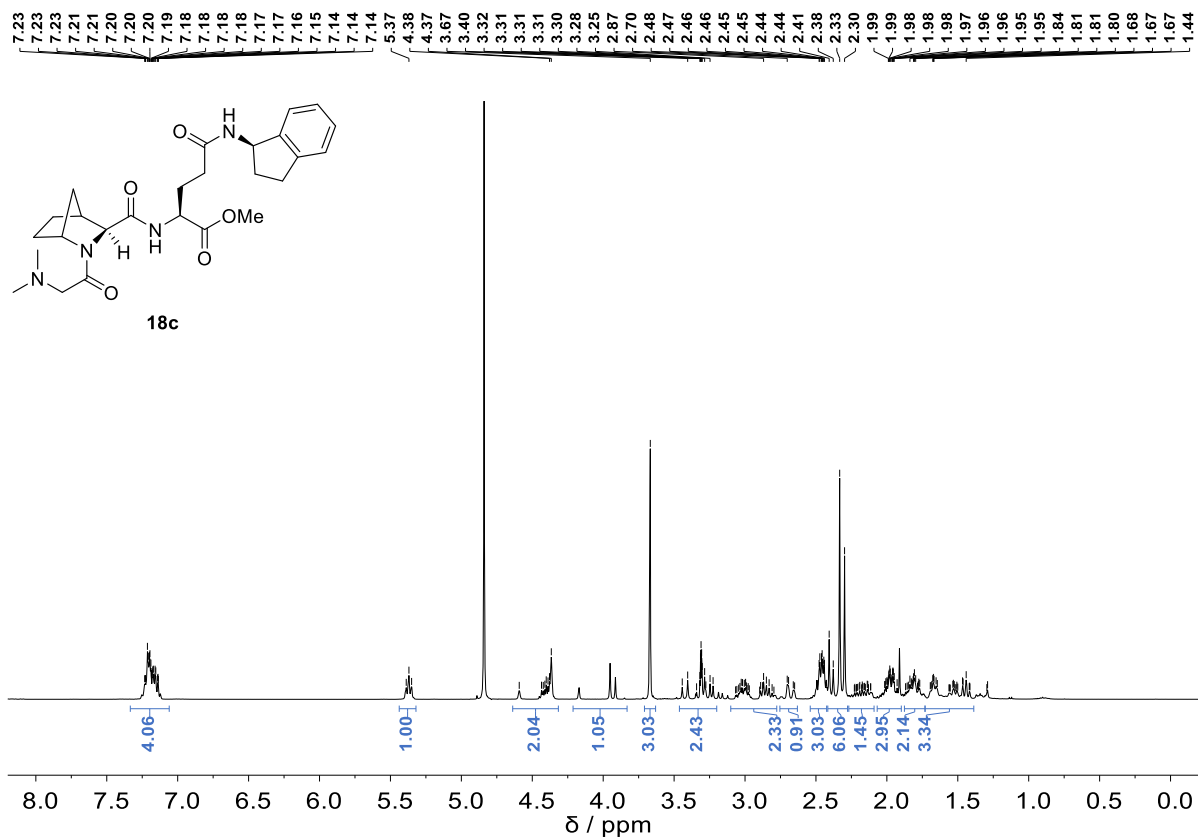

Figure S35. <sup>1</sup>H-NMR spectrum (400 MHz, CD<sub>3</sub>OD) of conjugate **18c**.

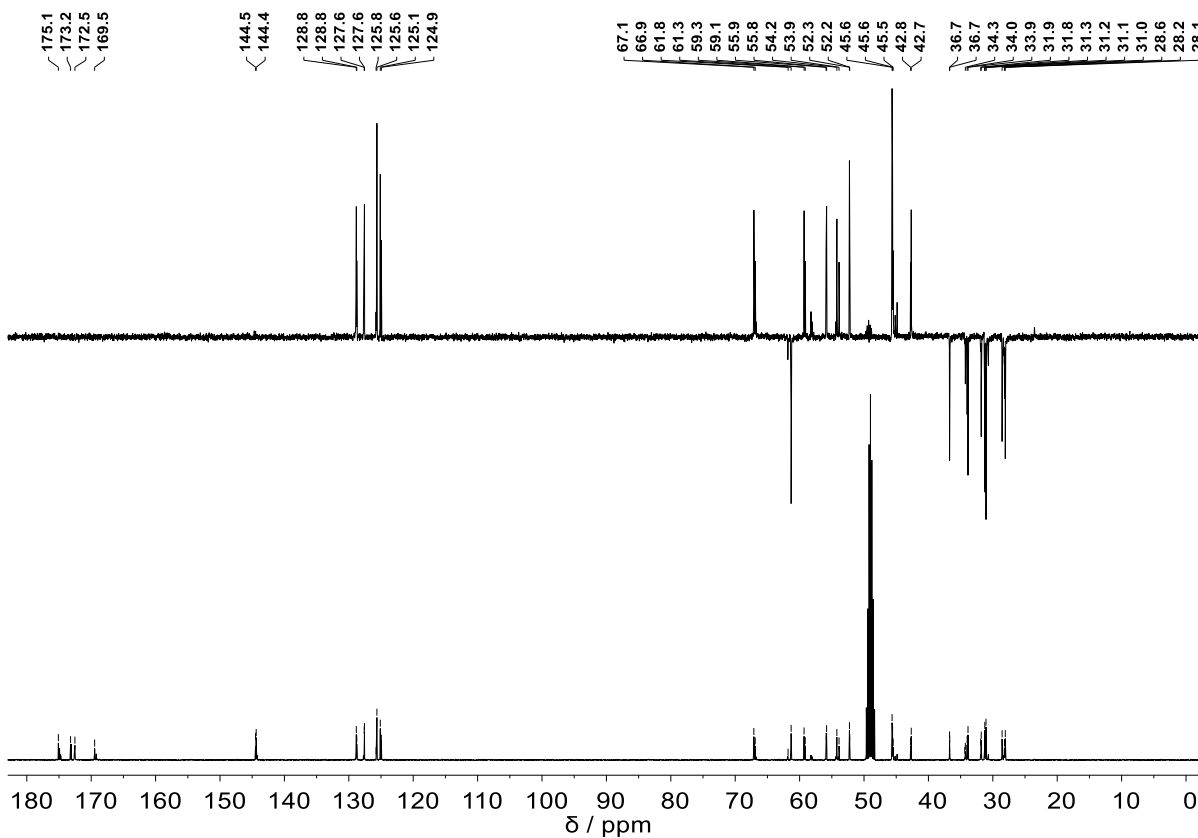

Figure S36. <sup>13</sup>C{<sup>1</sup>H}-NMR and DEPT-135 spectra (101 MHz, CD<sub>3</sub>OD) of conjugate **18c**.
